1 **Title: Three-dimensional biofilm growth supports a mutualism involving matrix**  
2 **and nutrient sharing**

3

4 **Authors**

5 Heidi A. Arjes<sup>1</sup>, Lisa Willis<sup>1</sup>, Haiwen Gui<sup>1</sup>, Yangbo Xiao<sup>1</sup>, Jason Peters<sup>2,3,4,5,6</sup>, Carol  
6 Gross<sup>2</sup>, Kerwyn Casey Huang<sup>1,7,8,\*</sup>

7

8 **Affiliations**

9 <sup>1</sup>Department of Bioengineering, Stanford University School of Medicine, Stanford, CA  
10 94305, USA

11 <sup>2</sup>Department of Cell and Tissue Biology, University of California San Francisco, San  
12 Francisco, CA 94158, USA

13 <sup>3</sup>Pharmaceutical Sciences Division, School of Pharmacy, University of Wisconsin-  
14 Madison, Madison, Wisconsin, USA

15 <sup>4</sup>Great Lakes Bioenergy Research Center, Wisconsin Energy Institute, University of  
16 Wisconsin-Madison, Madison, Wisconsin, USA

17 <sup>5</sup>Department of Bacteriology, University of Wisconsin-Madison, Madison, Wisconsin,  
18 USA

19 <sup>6</sup>Department of Medical Microbiology and Immunology, University of Wisconsin-  
20 Madison, Madison, Wisconsin, USA

21 <sup>7</sup>Department of Microbiology & Immunology, Stanford University School of Medicine,  
22 Stanford, CA 94305, USA

23 <sup>8</sup>Chan Zuckerberg Biohub, San Francisco, CA 94158

24

25 \*Corresponding author: [kchuang@stanford.edu](mailto:kchuang@stanford.edu)

26

27 *Keywords:* essential genes, CRISPRi, *alrA*, D-alanine, cell-wall synthesis, metabolism,

28 surface growth, three-dimensional geometry, extracellular matrix, high-throughput

29 screening, cross-complementation

## 30 **Summary**

31 Life in a three-dimensional structure such as a biofilm is typical for many bacteria, yet  
32 little is known about how strains with different genotypes interact in this context. Here, to  
33 systematically explore gene knockdowns across various three-dimensional contexts, we  
34 created arrayed libraries of essential-gene CRISPRi knockdowns in the model biofilm-  
35 forming bacterium *Bacillus subtilis* and measured competitive fitness during colony co-  
36 culture with a wild type-like parent on different media and at different knockdown levels.  
37 Partial knockdown led to a wide range of fitness phenotypes, with targeting of  
38 translation-related genes often leading to lower growth rates and rapid out-competition  
39 by the parent. Several knockdowns competed differentially in biofilms versus non-biofilm  
40 colonies, in some cases due to lack of a particular nutrient in one medium. Cells  
41 depleted for the alanine racemase AlrA died in monoculture, but co-cultures survived via  
42 nutrient sharing in a biofilm but not in liquid. This rescue was enhanced in biofilm co-  
43 culture with a parent unable to produce extracellular matrix, due to a mutualism  
44 involving nutrient and matrix sharing. Including *alrA*, we identified several examples of  
45 mutualism involving matrix sharing that occurred in a three-dimensional biofilm colony  
46 but not when growth was constrained to two dimensions. These findings demonstrate  
47 that growth in a three-dimensional biofilm can promote genetic diversity through sharing  
48 of secreted factors, and illustrate the role of matrix production in determining trajectories  
49 for biofilm evolution that may be relevant to pathogens and other environmental  
50 bacteria.

## 51 **Introduction**

52 In natural environments, many bacteria grow in dense, three-dimensional multicellular  
53 communities held together by extracellular matrix, often called biofilms. Biofilms have  
54 widespread clinical [1], industrial [2], and biotechnological [3] implications. Biofilms allow  
55 for genetic differentiation and division of labor that can mutually benefit distinct  
56 genotypes. For instance, in a dual-species biofilm, extracellular matrix components  
57 were functionally exploited by multiple species to drive emergent structural and  
58 mechanical properties of the biofilm that affected viability [4]. Additionally, the rate at  
59 which mutations fix in a population of a given size is higher in microbial colonies  
60 compared to well-shaken, liquid cultures [5], suggesting that spatial confinement  
61 supports an increase in genetic variation. Spatial confinement dramatically increases  
62 the frequency of interactions between nearby cells and thus the potential for coupled  
63 evolutionary outcomes, enhancing random genetic drift [6]. However, mechanisms that  
64 support genetic diversity in the context of a three-dimensional bacterial colony or biofilm  
65 remain underexplored [7].

66  
67 The model organism *Bacillus subtilis* is a soil-dwelling species that adheres to plant  
68 roots as a biofilm [8]. In laboratory conditions, *B. subtilis* grows on surfaces in biofilm or  
69 non-biofilm colonies depending on the growth medium. In the commonly used rich  
70 medium LB, *B. subtilis* grows as a colony with limited biofilm characteristics [9]. By  
71 contrast, when cultured on the biofilm-promoting medium MSgg [10], *B. subtilis* natural  
72 isolates produce extracellular matrix composed of secreted polysaccharides and  
73 proteinaceous components that hold cells together and enhance biofilm colony

74 expansion [7, 11, 12]. The extracellular matrix also determines colony architecture  
75 through the three-dimensional pattern of growth and wrinkling [13]. This architecture  
76 creates a variety of contexts for genetically identical cells to differentially express genes  
77 depending on their location, and indeed biofilms contain functionally distinct  
78 subpopulations [14, 15]: living cells differentiate into extracellular-matrix producers,  
79 sporulating cells, and motile cells, while dead cells may be cannibalized [16-18]. Thus,  
80 biofilms are an environment with heightened potential for interactions among cells in  
81 distinct transcriptional states and/or genetic backgrounds. Furthermore, biofilm-specific  
82 interactions can be identified and characterized by comparing biofilm and non-biofilm  
83 growth conditions.

84

85 The explosion of interest in microbial communities in recent years has stimulated a  
86 variety of approaches for identifying interspecies interactions. Liquid co-cultures have  
87 been used to quantify interaction networks [19] and to dissect changes in antibiotic  
88 sensitivity in co-cultures [20], but liquid growth cannot be used to identify biofilm or  
89 colony-specific interactions as it removes the spatial context of community growth and  
90 likely prioritizes long-range interactions over short-range physical contacts. Moreover,  
91 determining the amount of each strain in a co-culture often relies on laborious methods  
92 such as dilution plating and colony counting [20, 21], which may be complicated if cells  
93 adhere to each other. Microfluidics has facilitated the production and high-throughput  
94 analysis of droplets with mixed species, but these approaches again rely on liquid  
95 growth and the resulting community has very few cells compared to most natural  
96 communities [22, 23], making it difficult to study complex fitness phenotypes beyond

97 those affecting initial growth. The production of antibiotics by certain species has been  
98 investigated using the inhibition of colony growth of other species at a distance [24-26],  
99 and a colony-based screen identified interspecies interactions between *B. subtilis* and  
100 other soil bacteria [27]. While powerful, these methods are not applicable to  
101 investigating genetically distinct strains growing together in a three-dimensional  
102 structure. The increased availability of mutant libraries across organisms [28-31]  
103 motivates the development of a colony-based strategy for high-throughput screening of  
104 the fitness of strains within co-cultures.

105  
106 Both non-essential and essential genes (so defined based on survival in a typical  
107 laboratory environment such as liquid growth in LB) may impact fitness in any  
108 environment. While chemical-genetic screens of ordered libraries of deletions of non-  
109 essential genes have revealed novel phenotypes and elucidated the mechanism of  
110 action of drugs [32, 33], and phenotypic screens of transposon libraries have identified  
111 sporulation- and biofilm-related non-essential genes [34, 35], essential genes have  
112 traditionally been challenging to address. CRISPR interference (CRISPRi) utilizes an  
113 endonuclease-dead version of Cas9 (dCas9) to inhibit transcription from a gene of  
114 interest [36], facilitating tunable expression of any gene. Previously, we created a library  
115 of CRISPRi knockdowns of each essential gene in the non-biofilm-forming strain *B.*  
116 *subtilis* 168, which we used to uncover essential gene networks and to identify  
117 functional classes of genes based on growth and morphology [30]. In each strain of this  
118 library, the level of an essential gene can be titrated, from basal knockdown that allows  
119 robust growth of cells in liquid cultures, to full knockdown that inhibits the growth of

120 many strains [30]. Thus, CRISPRi targeting of essential genes provides the potential for  
121 a wide distribution of phenotypes, enabling determination of the effects of essential  
122 gene disruption without completely inhibiting growth [37]. This ability to achieve tunable  
123 knockdown is particularly appealing for quantifying interstrain interactions, by contrast to  
124 the lethal phenotype of complete removal of essential genes. CRISPRi was recently  
125 used to identify genes that regulate biofilm formation in *Pseudomonas fluorescens* [38];  
126 the efficacy of CRISPRi for *B. subtilis* in a colony/biofilm environment has yet to be  
127 ascertained.

128  
129 Here, we created GFP-labeled libraries of CRISPRi essential-gene knockdowns in the  
130 biofilm-forming strain *B. subtilis* 3610 to investigate the fitness consequences of gene  
131 knockdowns and interstrain interactions within three-dimensional biofilm and non-biofilm  
132 colonies. We demonstrated that the level of CRISPRi knockdown is tunable during  
133 colony growth on LB and MSgg agar. We developed a high-throughput method for  
134 screening monocultures and co-culture colonies on agar plates, and applied this method  
135 to quantify growth and fitness when CRISPRi knockdowns were co-cultured with a wild-  
136 type-like parent strain. We observed a wide range of fitness phenotypes across media  
137 and knockdown levels, with partial knockdowns of translation-related genes producing  
138 the lowest fitness, likely due to their negative impact on growth rate. We discovered that  
139 full knockdown of *alrA*, which encodes an alanine racemase required for cell-wall  
140 synthesis, was rescued by the presence of wild-type cells in a co-culture biofilm colony  
141 but not in liquid. This rescue was enhanced and stable over time when parent cells were  
142 unable to produce extracellular matrix, revealing a mutualistic interaction between these

143 strains. Finally, we identified several other knockdowns with higher competitive fitness  
144 when the parent cells are deficient in extracellular matrix production, as long as growth  
145 occurs in three dimensions, suggesting that these genes have mutualistic potential via  
146 nutrient and matrix sharing. These findings highlight the importance of colony geometry  
147 and matrix production in determining gene essentiality and interstrain genetic  
148 interactions, and provide foundational knowledge of mechanisms that support genetic  
149 diversity in in pathogenic and environmental biofilms.



150 **Results**

151

152 **Construction of a knockdown library for probing gene essentiality in *B. subtilis***

153 **3610**

154 To study genetic interactions involving critical cellular processes within a biofilm, we  
155 constructed a CRISPRi knockdown library in the biofilm-forming *B. subtilis* strain 3610  
156 (Methods). The library contains 302 strains: the 252 known essential genes in *B. subtilis*  
157 strain 168, 47 genes that were initially classified as essential in 168 [39] but later  
158 revealed to be non-essential or conditionally essential [29], and three internal controls  
159 expressing dCas9 without any guide RNAs (Table S1) [30]. Each strain in the library  
160 contains a xylose-inducible copy of *dcas9* and an sgRNA targeting the gene of interest  
161 (Fig. 1A). In addition, *gfp* is incorporated at the *sacA* locus to allow visualization and  
162 quantification of the knockdown strain (Fig. 1A). The *sacA::gfp* strain exhibited similar  
163 growth and biofilm wrinkling as a parental unlabeled control on both non-biofilm LB agar  
164 and biofilm-promoting MSgg [10] agar (Fig. 1B). We refer to colonies on LB and MSgg  
165 as “non-biofilm” colonies and “biofilm” colonies, respectively, although it is important to  
166 note that the biofilm definition is nuanced and colonies on LB may have some biofilm  
167 characteristics [9].

168

169 To determine whether CRISPRi can be used to knock down gene expression in non-  
170 biofilm and biofilm colonies, we engineered a parent strain containing *rfp* under a  
171 constitutive promoter and used CRISPRi to target *rfp*. In this strain, RFP levels in non-  
172 biofilm colonies on LB agar plates ranged from 40% (basal knockdown) to ~0% (full

173 knockdown) (Fig. S1A), a comparable range to knockdown of the domesticated strain  
174 168 in liquid LB [30]. RFP levels in biofilm colonies on MSgg agar ranged from ~90%  
175 (basal knockdown) to ~0% (full knockdown) (Fig. S1A). Thus, CRISPRi is an effective  
176 tool to knock down gene expression in non-biofilm and biofilm colonies.

177

### 178 **High-throughput screening of competitive fitness in a colony**

179 We compared the colony-growth phenotypes of GFP-labeled knockdown strains grown  
180 either alone or mixed with a control strain modified with xylose-inducible dCas9 (without  
181 an sgRNA) and constitutive expression of RFP (henceforth referred to as parent-RFP)  
182 that exhibits wild-type-like biofilm formation (Fig. 1A,B). After growing each strain  
183 individually in liquid LB, GFP-labeled knockdown strains were spotted either alone or  
184 mixed with parent-RFP onto agar plates (Fig. 1C, Fig. S2). Colony phenotypes were  
185 quantified using a custom image-analysis pipeline that segmented plates into colonies  
186 and computed the ratio of GFP:RFP for each colony; colony size was measured  
187 manually (Fig. 1D, S1B,C; Methods). Each plate included a titration row of colonies  
188 grown from mixtures of the parent-GFP strain with the parent-RFP strain at known  
189 concentrations from 0% to 100% parent-GFP (Fig. 1D, Fig. S2). Quantification of the  
190 titration row closely agreed with the predicted ratio of GFP:RFP at each time point (16,  
191 24, and 48 h) (Fig. 1D, S1D), indicating that the relative fraction of GFP-labeled mutants  
192 in co-culture with the parent-RFP strain can be accurately quantified through  
193 comparison of the GFP:RFP ratio with the titration row (Methods). Thus, our screen  
194 allows us to quantitatively compare growth as a monoculture to growth in co-culture  
195 through this competitive fitness value (Fig. 1C).

196

197 **Gene knockdown results in a broad range of colony sizes and competitive**  
198 **fitnesses**

199 To measure growth in monocultures or co-cultures across conditions, we spotted  
200 knockdowns on their own or mixed with parent-RFP on LB and MSgg agar without and  
201 with xylose. After 16 h of growth, colony sizes of basal knockdown monocultures  
202 exhibited a narrow distribution on LB agar, but were more widely distributed on MSgg  
203 agar (Fig. 2A, Fig. S3A, Table S2). By contrast to growth as monocultures on LB, basal  
204 knockdowns co-cultured with the parent for 16 h showed a broadly distributed  
205 competitive fitness on LB agar: only 92 of the strains had a fitness within 2 standard  
206 deviations of the mean of controls, while the remaining 210 strains were significantly  
207 defective in competition (below 2 standard deviations of the mean of the controls) (Fig.  
208 2B, Table S2). A competitive fitness of 1 signifies equal amounts of GFP-labeled  
209 knockdown and parent-RFP, and 0 means that the GFP-labeled knockdown was  
210 completely out-competed by the parent-RFP strain. On MSgg agar, competitive fitness  
211 displayed a similar trend, with 198 basal knockdowns exhibiting a significant fitness  
212 defect after 16 h (Fig. 2A,B, Table S2). As expected, when transcription was fully  
213 knocked down, fitness was even more compromised: 168 and 143 strains had fitness  
214  $<0.08$  after 16 h of growth on LB and MSgg agar, respectively (Fig. 2B, Table S2).  
215 Together, these data demonstrate that even though phenotypes were generally subtle  
216 for monocultures grown on non-biofilm-promoting LB agar, screening the library on  
217 biofilm-promoting MSgg agar or in competition with a parent strain uncovered  
218 phenotypes even under basal knockdown.

219  
220 Several strains competed poorly with the parent even with basal knockdown in both  
221 non-biofilm and biofilm colonies (Fig. 2B). Interestingly, some non-essential genes had  
222 low competitive fitness. For instance, *mapA*, which encodes a methionine  
223 aminopeptidase, competed poorly in both LB and MSgg colonies, and CRISPRi  
224 induction further reduced fitness (Table S2, Fig. S3B). Analysis of DAVID functional  
225 annotations of strains with competitive fitness >2 standard deviations below the mean of  
226 controls revealed significant enrichment of structural constituents of ribosomes  
227 ( $p=9.8\times 10^{-4}$  and  $p=2.1\times 10^{-2}$  on LB and MSgg agar, respectively). Some of the  
228 ribosomal-protein strains that competed most poorly exhibited ~20% lower maximum  
229 growth rate than wild type in liquid cultures (Fig. 2C), suggesting that the reduced  
230 competitive fitness of these strains is due to their reduced growth rate. Indeed, a  
231 reaction-diffusion model of colony growth of a co-culture indicated that a strain's  
232 maximum growth rate is a major determinant of competitive fitness, and that the 20%  
233 decrease of maximum growth rate in certain ribosomal protein knockdowns is consistent  
234 with our experimental measurements of their competitive fitness (Fig. S3C, Methods).  
235  
236 By contrast, several strains had fitness in co-culture with the wild-type-like parent similar  
237 to controls for basal and/or full induction (Fig. 2B), suggesting that the targeted gene  
238 was rendered less essential by co-culture with the wild-type-like parent. DAVID  
239 functional enrichment analysis of basal knockdowns with fitness values within 1  
240 standard deviation of the mean across controls ( $n=41$  and 46 strains for LB and MSgg,  
241 respectively) highlighted integral membrane components on both solid media

242 ( $p=2.1\times 10^{-3}$  for both LB and MSgg). Under basal conditions, there were 4 knockdowns  
243 (*menH* and *cytC* on LB and *aroF* and *rny* on MSgg) in which monoculture growth was  
244 clearly compromised by induction but competitive fitness remained high (Fig. S3B). As  
245 *menH* and *aroF* are involved in synthesis of menaquinone (vitamin K2) and aromatic  
246 amino acids, respectively, the high competitive fitness may result from nutrient sharing  
247 within the colony. In addition, aromatic amino acid biosynthesis genes were enriched in  
248 basal knockdowns with high competitive fitness on LB agar ( $p=1.6\times 10^{-2}$ ), potentially due  
249 to the presence of aromatic amino acids in rich LB medium but not in MSgg. These data  
250 underscore the medium-dependence of gene essentiality in co-culture colonies.

251  
252 To validate these findings, we replicated fitness measurements over time on a subset of  
253 strains with the highest or lowest competitive fitness values during basal knockdown on  
254 LB or MSgg agar. We found that the competitive fitness phenotype was highly  
255 reproducible and relatively stable over two days of colony growth (Fig. 2D,E, S3D,E),  
256 highlighting the utility of our CRISPRi library for probing the fitness of essential gene  
257 knock down in co-cultures.

258  
259 **Several biosynthesis-related genes have different phenotypes in rich versus**  
260 **minimal media**

261 The distinct nutrient compositions of LB and MSgg, along with the much broader  
262 distribution of monoculture colony sizes in MSgg compared with LB (Fig. 2A), motivated  
263 a comparison of competitive fitness across media. Somewhat surprisingly given the  
264 likelihood of different metabolic profiles due to media compositional differences, 93% of

265 the strains exhibited similar competitive fitness (defined here as within 0.24 or 0.3 of the  
266  $y=x$  line for basal or full knockdown, respectively) on MSgg and LB agar, whether the  
267 targeted gene was basally or fully knocked down (Fig. 3A, Table S2). Nonetheless, we  
268 identified 36 strains competed with the parent-RFP strain better on MSgg than on LB,  
269 and/or vice versa, under basal or full knockdown (Fig. 3A,B, Table S3). Strains that  
270 competed better in one medium compared to the other were statistically enriched for  
271 genes involved in amino-acid biosynthesis ( $p=4.7\times 10^{-6}$  and  $p=8.3\times 10^{-5}$  for basal and full  
272 knockdown, respectively), suggesting that some strains benefit from nutritional  
273 components specific to one medium (Fig. 3A, Table S3).

274  
275 Despite the undefined nature of LB, it was still possible for many strains to identify  
276 candidate components whose addition to the medium with lower competitive fitness  
277 might rescue the deficit. We selected 20 knockdowns with medium-dependent fitness to  
278 pursue further, many of which displayed fitness differences for both basal and full  
279 knockdown (Table S3). The *glyA* knockdown had higher competitive fitness on LB agar  
280 than on MSgg agar, and as hypothesized, addition of glycine to MSgg significantly  
281 improved fitness in basal and induced conditions, to levels closely matching fitness on  
282 LB (Fig. 3C). Similarly, adding  $Mg^{2+}$  or  $Mn^{2+}$  to LB agar at the same levels as in MSgg  
283 restored the competitive fitness of *mgtE* and *mntA* full knockdowns, respectively, to  
284 levels on MSgg (Fig. 3C, S4A). Somewhat surprisingly, even though many of the  
285 remaining 17 knockdowns with medium-dependent fitness naturally suggested  
286 candidates for a missing nutrient, they did not exhibit increased fitness when the  
287 hypothesized nutrient was added to the medium with reduced fitness (Fig. S4B, Table

288 S3), showing that at least exogenous provision of those nutrients is insufficient to  
289 complement the medium-specific fitness defect. Together, these results indicate that  
290 medium-dependent competition ratios can arise due to both nutrient compositional  
291 differences between media and other mechanisms that remain unidentified but  
292 highlight potentially important factors in selection during colony growth.

293

### 294 **Wild-type cells rescue *alrA* knockdown in a biofilm colony by sharing D-alanine**

295 Since growth in a structured community provides opportunities for nutrient sharing and  
296 cellular differentiation, we hypothesized that some essential-gene knockdowns would be  
297 unable to grow as a colony in monoculture but would fare better in co-culture with wild-  
298 type-like parent-RFP cells. Across our *sacA::gfp* essential-gene knockdown library, we  
299 did not identify any knockdowns that exhibited robust growth in a colony co-culture but  
300 died as a monoculture (Fig. S2, S3, Table S2). (To conform to our inoculation protocol  
301 for biofilm cultures in which we used 1  $\mu$ L of a liquid culture of OD  $\sim$ 1.0 (Methods), our  
302 high-throughput screen involved inoculation of each  $\sim$ 2 mm-diameter spot with  $\sim 2 \times 10^5$   
303 cells, likely facilitating the partial growth of some knockdowns that would be hampered  
304 in growth from a single cell on plates with xylose.) We found that disruption of the *thrC*  
305 locus prevents wrinkling formation on MSgg, presumably reflecting a growth defect, so  
306 we hypothesized that insertion of *gfp* at the *thrC* locus might exacerbate growth  
307 inhibition due to knockdown of certain essential genes. Thus, we constructed a second,  
308 *thrC::gfp* library of knockdowns of all 302 strains and screened it on MSgg with xylose.

309

310 In the *thrC::gfp* library, *alrA* was the only knockdown that failed to form a colony as a  
311 monoculture but survived with the parent-RFP strain in biofilms on MSgg agar with  
312 xylose (Fig. 4A, S5A,B). AlrA is a racemase that converts L-alanine to D-alanine and is  
313 required for cross-linking of the peptidoglycan cell wall (Fig. 4B). Full knockdown of *alrA*  
314 expression during liquid growth in a strain without *gfp* disruption of *thrC* led to bulging  
315 indicative of cell-wall defects (Fig. 4C, S5C). The *alrA* strain from the *thrC::gfp* library  
316 managed to grow as a monoculture into a colony similar in size to the inoculation spot  
317 on LB-xylose agar but not beyond, as did the *alrA* strain from the *sacA::gfp* library on  
318 LB-xylose and MSgg-xylose plates. As discussed above, the absence of complete lysis  
319 is likely due to the high initial density driving growth of a visible colony (Fig. S3A);  
320 streaking all *alrA* strains resulted in a substantial reduction in the number of colonies on  
321 plates with xylose compared to without for both LB and MSgg (Fig. S5D), indicating that  
322 the full-knockdown phenotype across all media and genotypes is severe for *alrA* at  
323 lower initial cell densities.

324

325 We hypothesized that cells with full knockdown of *alrA* transcription were able to  
326 maintain their growth in biofilm co-culture because the parent-RFP cells were providing  
327 the necessary D-alanine. To test this hypothesis, we grew monocultures of an *alrA*  
328 strain without *gfp* in the genome as on MSgg-xylose with exogenous D-alanine, and  
329 found that D-alanine rescued biofilm colony growth (Fig. 4D). D-methionine, an amino  
330 acid that can substitute for D-alanine in cell-wall crosslinking [40], also rescued *alrA*  
331 growth on MSgg-xylose plates (Fig. 4D), while other D-amino acids that are not  
332 incorporated into the cell wall did not rescue colony growth (Fig. S5E,F), suggesting that



333 D-alanine's specific role in peptidoglycan synthesis is rescued. Thus, sharing of D-  
334 alanine within a biofilm rescues *alrA*-depleted cells, likely by stabilizing mutant cell  
335 walls.

336

337 To test whether *alrA* cells are rescued by the parent-RFP strain in liquid MSgg-xylose,  
338 we grew liquid co-cultures and plated dilutions at hourly time points to quantify survival  
339 (separating the two strains based on fluorescence). The vast majority of *alrA* cells died  
340 within hours in both liquid monocultures and co-cultures with the parent-RFP strain (Fig.  
341 4E). Thus, the rescue of *alrA* knockdown cells by D-alanine sharing in co-cultures is  
342 specific to growth in a colony, presumably due to the close proximity of cells that  
343 facilitates D-alanine sharing.

344

#### 345 ***alrA* knockdown cells stably co-exist with extracellular matrix-deficient wild-type** 346 **cells**

347 Secretion of extracellular matrix provides structural integrity to colony biofilms [41],  
348 including for *B. subtilis* strain 3610 on MSgg agar [42]. Thus, we wondered if matrix  
349 plays a role in the rescue of *alrA*, either by providing structural support to *alrA*  
350 knockdown cells with weaker walls (Fig. 4C) or by facilitating the diffusion of D-alanine.  
351 To test this idea, we deleted the genes encoding both of the main extracellular matrix  
352 components (EpsH, TasA) from the parent-RFP strain and the *alrA* knockdown in the  
353 *sacA::gfp* wrinkling-proficient library. We mixed the two matrix-deficient strains and  
354 quantified colony size and competitive fitness in full knockdown conditions on MSgg-  
355 xylose plates. As expected, matrix-deficient co-culture colonies were smaller than

356 matrix-proficient co-cultures, as matrix is necessary for robust biofilm colony growth [11]  
357 (Fig. 5A). Nonetheless, matrix-deficient co-cultures exhibited approximately the same  
358 fraction of *alrA* cells as matrix-proficient co-cultures (Fig. 5A,B, S6A). Thus, matrix is not  
359 required for the growth rescue of *alrA*-knockdown cells.

360

361 Surprisingly, combining the matrix-proficient and wrinkling-proficient *alrA* strain under  
362 full knockdown with the matrix-deficient ( $\Delta epsH \Delta tasA$ ) parent-RFP strain resulted in an  
363 increased fraction of *alrA*-depleted cells relative to co-cultures with the matrix-proficient  
364 parent-RFP strain. In addition to improved growth of the *alrA* knockdown, the RFP  
365 fluorescence of the matrix-deficient parent-RFP was also higher and occupied a larger  
366 area than in the co-culture of matrix-deficient *alrA* and parent-RFP strains (Fig. 5A).

367 Moreover, rather than a steady decrease in competitive fitness over time (Fig. 5A,B),  
368 the competitive fitness of *alrA* against the matrix-deficient parent was stable at ~1 for 48  
369 h. The increased and stable fitness of this strain combination suggests a synthetic  
370 mutualistic interaction, defined here as the fitness of both strains in co-culture being  
371 stable and higher than either strain on its own, in which matrix-deficient parent-RFP  
372 cells restore viability to *alrA* knockdown cells by providing D-alanine, and in turn *alrA*  
373 knockdown cells enhance growth of the parent-RFP strain by providing extracellular  
374 matrix.

375

376 Our finding that the competitive fitness of *alrA* decreased over time in a co-culture with  
377 parent-RFP in which both strains were matrix-deficient (and hence did not form a  
378 canonical biofilm) (Fig. 5A) indicates that the mutualism between *alrA* and the parent-

379 RFP strain requires growth in a matrix-capable biofilm. A recent study showed that  
380 biofilm colony expansion in three dimensions depends heavily on extracellular matrix,  
381 while two-dimensional growth relies more on cell growth and division [43]. To test  
382 whether the mutualism between *alrA* and the matrix-deficient parent was dependent on  
383 three-dimensional growth, we grew co-cultures between an agar pad and a coverslip. In  
384 this configuration, the growing edge of the colony has a thickness of only one cell,  
385 essentially constraining growth to two dimensions (Fig. S6B). Now, in all matrix-  
386 production combinations of the *sacA::gfp alrA* strain under full knockdown and parent-  
387 RFP, including matrix-proficient *alrA* with the matrix-deficient parent, the parent-RFP  
388 strain had a growth advantage at the edge of the colony and out-competed the *alrA*  
389 knockdown (Fig. 5C, S6A). Thus, the mutualism we discovered between *alrA* under full  
390 knockdown and the matrix-deficient parent is can be eliminated by removing the ability  
391 of the colony to grow in three dimensions.

392

### 393 **Many metabolism-related mutants exhibit enhanced rescue in three-dimensional** 394 **biofilms with matrix-deficient wild-type-like cells**

395 Our discovery that *alrA* knockdown cells grew in a mutualism with an extracellular  
396 matrix-deficient parent (Fig. 5A,B) led us to hypothesize that other essential-gene  
397 knockdowns might display enhanced growth when cultured with the matrix-deficient  
398 parent. To test this hypothesis, we performed co-culture screens of each strain in the  
399 *sacA::gfp* library with either the matrix-proficient or matrix-deficient parent-RFP strain on  
400 MSgg-xylose (Fig. 5D, S6C, Table S2). We measured competitive fitness at 16, 24, and  
401 48 h to identify strains that had increased and relatively stable fitness when they were

402 the sole provider of extracellular matrix relative to competition with the wild-type-like  
403 parent-RFP. For each strain, we calculated a mutualism score defined as the fitness  
404 increase due to deletion of matrix components from the parent at 48 h compared with  
405 the fitness increase at 16 h; a positive score reflects a growing benefit of being the sole  
406 matrix provider, and hence implies relatively stable fitness (Fig. 5D, Fig. S6D). We  
407 focused on all strains with a mutualism score 2 standard deviations above the mean  
408 across controls ( $>0.22$ , Fig. S6D).

409  
410 On MSgg-xylose, in addition to *alrA*, eight other essential-gene full knockdowns  
411 exhibited a high mutualism score (Fig. 5E, S6E,F, Table S5). Of these strains,  
412 knockdowns of genes encoding the glutamate racemase (*racE*) and enzymes involved  
413 in menaquinone (vitamin K<sub>2</sub>) synthesis (*menE*) were candidates for nutrient- and matrix-  
414 sharing mutualisms similar to that of *alrA*. Knockdowns of two other genes in the  
415 menaquinone synthesis pathway (*menC* and *menD*) displayed mutualism scores slightly  
416 below 0.22 (Fig. 5E, Table S4), providing further support for a menaquinone-based  
417 mutualism. The other essential-gene knockdowns with high mutualism scores encode  
418 proteins that bind DNA (*scpA* and *hbs*) or are related to translation (*rnz* and *frr*); these  
419 genes likely either play an indirect role in regulating biosynthesis of a shared nutrient to  
420 support the mutualism, or employ other mechanisms outside of nutrient sharing. In  
421 addition, four non-essential strains exhibited high mutualism scores (Fig. S6F),  
422 indicating that the benefits of matrix sharing can extend to genes that are not critical for  
423 growth as a monoculture.

424

425 Since the *alrA* full knockdown exhibited mutualism in a three-dimensional biofilm but not  
426 when growth was confined to two dimensions, we tested whether the other mutualisms  
427 were maintained during two-dimensional growth. We grew *racE*, *menE*, *rnz*, and *hbs* full  
428 depletions in individual co-cultures with the matrix-deficient parent-RFP between a glass  
429 slide and a coverslip. In each case, the knockdown was out-competed by the parent-  
430 RFP strain at the growing edge of the colony (Fig. 5F). In sum, these data suggest that  
431 matrix-dependent mutualisms generally require growth in a three-dimensions.

## 432 **Discussion**

433 Here, we created two new libraries of essential gene knockdowns in a biofilm-capable  
434 *B. subtilis* strain, and developed a powerful high-throughput screen of competition in  
435 bacterial co-cultures to reveal genetic interactions specific to growth in three-  
436 dimensional colonies. First, we showed that basal knockdown of some ribosomal  
437 proteins reduces competitive fitness with a wild-type-like strain in co-culture colonies  
438 (Fig. 2), suggesting a high degree of selection on these genes during colony growth.  
439 Second, we found that medium composition can dramatically alter competition (Fig. 3),  
440 highlighting the role of the extracellular environment during evolution in a multicellular  
441 context. Third, we discovered that knockdown of *alrA* can be rescued through sharing of  
442 D-alanine in a three-dimensional biofilm, a context in which the gene is “less essential,”  
443 but not in liquid or when growth is confined two dimensions between an agar surface  
444 and a coverslip (Fig. 4,5). Finally, we uncovered a mutualism between *alrA* knockdown  
445 cells and a parent deficient in extracellular matrix production based on sharing of  
446 nutrients and matrix components, and used this finding to identify several other  
447 essential gene knockdowns exhibiting similar mutualistic interactions (Fig. 5). These  
448 findings illustrate how growth in a colony/biofilm can alter natural selection by  
449 supporting mutant cells that are less likely to survive on their own through short-range  
450 interactions.

451

452 Despite previous studies showing that D-alanine levels are undetectable in *B. subtilis*  
453 168 liquid culture supernatants [44], we found that D-alanine sharing in a biofilm can  
454 rescue *B. subtilis* 3610 mutants that cannot synthesize their own D-alanine. Thus, D-

455 alanine is produced and secreted in a biofilm by wild-type cells at sufficient levels to  
456 support growth of the mutant. Since full knockdown of *alrA* causes cells to bulge and die  
457 in liquid culture within hours (Fig. 4C,E), we infer that rescue likely occurs early in  
458 biofilm development prior to the period of substantial cell death that is thought to drive  
459 wrinkling [13], suggesting that rescue is not due to the release of D-alanine by dying  
460 cells. The close proximity of cells within the biofilm may aid in rescue, even if secreted  
461 D-alanine levels are low. Regardless, this rescue demonstrates that cell-wall synthesis  
462 mutants can be supported in native environments through sharing of cell-wall  
463 components, which could be provided by many other bacterial species in a multispecies  
464 community due to the common chemical makeup of peptidoglycan cell walls [40].

465  
466 Our observation that rescue of *alrA*-depleted cells did not occur when growth was  
467 constrained to two dimensions (Fig. 5C), combined with the finding that rescue occurred  
468 in co-culture biofilm colonies when both the *alrA* knockdown and the parent were matrix-  
469 deficient (Fig. 5A,B), indicates that some aspect of three-dimensional growth beyond  
470 matrix production is fundamental to the rescue. One possibility is liquid uptake facilitated  
471 by colony architecture, which has been hypothesized to act like a sponge and thereby  
472 drive colony expansion (even more so when extracellular matrix is present) [11, 45]. It is  
473 also possible that cellular differentiation and development are disrupted by limiting  
474 growth to a thin layer. Irrespective, our findings highlight the importance of future high-  
475 throughput genetic screens that embrace the natural context of three-dimensional  
476 colony growth on surfaces.

477

478 The stable mutualism that we discovered between the *alrA* knockdown and a matrix-  
479 deficient parent (Fig. 5B) resembles the initial behavior of  $\Delta$ *tasA* and  $\Delta$ *epsH* mutants  
480 grown together as pellicle biofilms on liquid surfaces, in which the pellicle architecture is  
481 preserved by cross-complementation for many passages [46]. Our discovery of matrix-  
482 based mutualisms involving multiple genes with a range of cellular functions (Fig. 5E)  
483 motivates future studies to probe the nature of the *tasA-epsH* interaction in these  
484 interactions, specifically to examine which matrix components are most important and  
485 whether mutualisms can be sustained through repeated passages or with different  
486 starting ratios of the strains in the co-culture. Importantly, the fact that these mutualisms  
487 appear to generally require growth in three dimensions further highlights the importance  
488 of the three-dimensional geometry of the native environment during evolution.

489  
490 Together, our results demonstrate that growth in a biofilm can drive genetic diversity  
491 and illustrate the potential for mutualism between nutrient and matrix sharing in native  
492 biofilms. Such mutualisms may occur during plant root colonization, when the bacterial  
493 extracellular matrix is particularly important and may serve to pull nutrients from the root  
494 and surrounding soil [8]. In addition to the potential implications for plant growth-  
495 promoting bacteria in the rhizosphere, this study provides a foundation to understand  
496 how microbial biofilm growth affects selection in industrial and clinical settings.



497 **Acknowledgments**

498 The authors thank the Huang lab and Petra Levin for helpful discussions, Nicola  
499 Stanley-Wall for providing the *sacA::gfp* construct, and Dan Kearns for providing matrix  
500 mutant constructs. The authors acknowledge support from the Allen Discovery Center  
501 at Stanford on Systems Modeling of Infection (to H.A.A. and K.C.H.), the Stanford  
502 Bioengineering Summer Research Experience for Undergraduates Program (to H.G.),  
503 and NIH K22 Award AI137122 (to J.P.). K.C.H. is a Chan Zuckerberg Biohub  
504 Investigator.

505 **METHODS**

506

507 **Media**

508 Strains were grown in LB (Lennox broth with 10 g/L tryptone, 5 g/L NaCl, and 5 g/L  
509 yeast extract) or MSgg medium (5 mM potassium phosphate buffer, diluted from 0.5 M  
510 stock with 2.72 g K<sub>2</sub>HPO<sub>4</sub> and 1.275 g KH<sub>2</sub>PO<sub>4</sub>, and brought to pH 7.0 in 50 mL; 100  
511 mM MOPS buffer, pH 7.0, adjusted with NaOH; 2 mM MgCl<sub>2</sub>•6H<sub>2</sub>O; 700 μM  
512 CaCl<sub>2</sub>•2H<sub>2</sub>O; 100 μM FeCl<sub>3</sub>•6H<sub>2</sub>O; 50 μM MnCl<sub>2</sub>•4H<sub>2</sub>O; 1 μM ZnCl<sub>2</sub>; 2 μM thiamine HCl;  
513 0.5% (v/v) glycerol; and 0.5% (w/v) monosodium glutamate). MSgg medium was made  
514 fresh from stocks the day of each experiment for liquid cultures, or a day before the  
515 experiment for agar plates. Glutamate and FeCl<sub>3</sub> stocks were made fresh weekly.  
516 Colonies were grown on 1.5% agar plates. For nutrient addition assays (Fig. 3, S4), we  
517 supplemented LB with one of the following: 0.5% (w/v) monosodium glutamate, 2 mM  
518 MgCl<sub>2</sub>•6H<sub>2</sub>O, 50 μM MnCl<sub>2</sub>•4H<sub>2</sub>O, 2 mM MgCl<sub>2</sub>•6H<sub>2</sub>O, 0.5% (w/v) L-asparagine, 0.5%  
519 (w/v) L-aspartic acid, 0.5% (w/v) L-lysine, or 0.5% (w/v) D-glutamic acid, and we  
520 supplemented MSgg with one of the following: 0.5% (w/v) L-cysteine, 0.5% (w/v) L-  
521 glutamine, 0.5% (w/v) L-glycine, 0.5% (w/v) L-serine, or 0.5% (w/v) L-tryptophan. Where  
522 indicated, L-threonine was added to MSgg at a concentration of 0.1 mg/mL. D-amino  
523 acids (D-alanine, D-methionine, D-glutamate, D-leucine, D-serine, D-valine) were each  
524 used at a concentration of 0.04 mg/mL. We made TY medium for phage transduction  
525 using the LB recipe above supplemented with 10 mM MgSO<sub>4</sub> and 0.1 mM MnSO<sub>4</sub>.

526

527 Antibiotics for selection of mutant strains were used as follows: kanamycin (kan, 5  
528  $\mu\text{g}/\text{mL}$ ), MLS (a combination of erythromycin at 0.5  $\mu\text{g}/\text{mL}$  and lincomycin at 12.5  
529  $\mu\text{g}/\text{mL}$ ), chloramphenicol (cm, 5  $\mu\text{g}/\text{mL}$ ), tetracycline (tet, 12.5  $\mu\text{g}/\text{mL}$ ) and  
530 spectinomycin (spc, 100  $\mu\text{g}/\text{mL}$ ).

531

### 532 **Strain construction**

533 All strains and their genotypes are listed in Table S1. For library construction, we used  
534 SPP1 phage transduction [47]. We used a 168 strain containing *P<sub>xyI</sub>-dCas9* at the *lacA*  
535 locus (CAG74399) as a donor and wild-type strain 3610 (a gift from Dan Kearns) as the  
536 recipient to create the 3610-dCas9 parent strain (CAG74331) using MLS for selection.

537 We then used this 3610-dCas9 parent as the recipient and a strain with *P<sub>spachy</sub>-gfp* at  
538 the *sacA* locus (NRS1473, gift from Nicola Stanley Wall) or a strain with *P<sub>veg</sub>-gfp* at the  
539 *thrC* locus (HA47, construction described below) as the donor strain to create the  
540 parent-GFP strain expressing *dCas9* and *gfp*, using kanamycin and tetracycline for  
541 selection, respectively.

542

543 For construction of mutant strains, we used either the *sacA::gfp* parent or the *thrC::gfp*  
544 parent as the recipient strain and strains from a 168 CRISPRi library [30] as the donor.

545 We amended the phage transduction protocol to increase the throughput of strain  
546 construction as follows. We grew donor strains in 96-well deep-well plates (1-mL  
547 cultures in TY medium in 2-mL wells) for at least 5 h shaking at 37 °C with a Breath-  
548 easy (Sigma-Aldrich) film covering the plate. We then aliquoted 0.1 mL of  $10^{-5}$  dilutions  
549 of fresh phage stocks grown on strain 3610 cells ( $10^{-5}$  was chosen as the dilution factor

550 because it provided the appropriate level of lysis for our phage stock in a trial  
551 transduction) into 77 or 71 glass test tubes (each plate of the library contains 77 strains,  
552 except the fourth plate contains 71 strains). We added 0.2 mL of each culture to the  
553 tubes and incubated the entire rack at 37 °C for 15 min. Then, working quickly in  
554 batches of 11, we added 4 mL of TY molten soft agar (~55 °C) to each phage-cells  
555 mixture, mixed gently, and poured onto TY plates so that the soft agar covered the  
556 entire plate. We incubated these plates at 37 °C overnight in a single layer (not  
557 stacked). The next day, we examined the plates for lysis and added 5 mL TY broth with  
558 250 ng DNase to each plate and scraped the top agar with a 1-mL filter tip to liberate  
559 phage. We then pipetted the TY broth into a syringe attached to a 0.45- $\mu$ m filter and  
560 carefully filtered into a 5-mL conical vial. After filtering, 1 mL of lysate was added to the  
561 appropriate well of a deep-well 96-well plate. Once all of the phage was isolated, we  
562 arrayed 10  $\mu$ L of each phage stock into 96-well microtiter plates. We aliquoted 100  $\mu$ L of  
563 a saturated (>5 h of culturing, OD<sub>600</sub>>1.5) culture into the wells containing phage and  
564 incubated for 25 min at 37 °C without shaking. We plated the phage/cell mixtures onto  
565 selection plates (LB with chloramphenicol and citrate to select for the sgRNA locus) and  
566 incubated the plates for 18 h at 37 °C. Any plates that did not have visible colonies after  
567 this incubation were incubated further at room temperature, and colonies generally  
568 appeared within a day. We streaked transductant colonies for single colonies onto  
569 LB+chloramphenicol plates and stocked a single colony for each strain in the library by  
570 growing in 5 mL LB on a roller drum at 37 °C to mid- to late-log phase and then adding  
571 the culture to the appropriate well of 96-well plate with a final concentration of 15%  
572 glycerol. The library was stocked at -80 °C.

573

574 The GFP-labeled  $\Delta epsH \Delta tasA alrA$  knockdown strain (HA823) and the parent-RFP  
575  $\Delta epsH \Delta tasA$  strain (HA825) were constructed using phage transduction as described  
576 above, using DS9259 and DS3323 (gifts from Dan Kearns) as donor strains for  
577  $epsH::tet$  and  $tasA::tn10spc$ , respectively, and the  $sacA::gfp alrA$  knockdown strain  
578 (HA761) or parent-RFP (HA12) as the recipient. The  $epsH::tet$  transduction was  
579 performed first, and the resulting strains were used as the parent to add the  
580  $tasA::tn10spc$  construct.

581

582 To construct plasmid pDG1731-gfp ( $P_{veg}$ -sfGFP in a  $thrC$  integration construct), the  
583 following primers were used to clone superfolder GFP (sfGFP) and add the  $P_{veg}$   
584 promoter: forward,  
585 tcctagaagcttatcgaattcCTTATTAACGTTGATATAATTTAAATTTTATTTGACAAAAATGG  
586 GCTCGTGTTGTACAATAAATGTA ACTACTAGTACATAAGGAGGAACTACTATGAGC  
587 AAAGGAGAAGAACTTTTC; reverse,  
588 ttaagcaccggttattaTTTGTAGAGCTCATCCATGCC. The amplicon and pDG1731 were  
589 both digested with HindIII and AgeI and ligated together. The ligation was used to  
590 transform chemically competent *E. coli*. We transformed *B. subtilis* 168 with pDG1731-  
591 gfp to create HA45 and confirmed double crossover ( $spc^R$ ,  $MLS^S$ ), then used HA45 as  
592 the donor and HA2 as the recipient in phage transduction to create the  $thrC$  parent-GFP  
593 strain ( $P_{xyI}$ -dCas9  $thrC::P_{veg}$ -gfp, HA47).

594

595 **Growth conditions for library screens of growth on agar plates**

596 To grow the library for monocultures and co-cultures, we inserted a sterile 96-well  
597 Singer pin (Singer Instruments) into frozen glycerol stocks and applied pressure and  
598 agitation so that each pin picked up some of the frozen glycerol stock from the  
599 appropriate well. The Singer pin was used to spot onto LB agar in a rectangular Singer  
600 plus plate and the plate was incubated overnight at 37 °C. A sterile 96-well Singer pin  
601 was used to pick up cells from each colony and inoculate 200 µL of LB in a 96-well  
602 plate. The parent-GFP strain was inoculated in some of the empty wells on the edge of  
603 each plate as controls. The plate was covered with an AeraSeal breathable film (Sigma-  
604 Aldrich), and grown on a plate shaker at 37 °C for 4-5 h until all wells were cloudy  
605 (OD<sub>600</sub>~1.0).

606  
607 One hundred microliters of each culture were pipetted into a separate 96-well plate with  
608 100 µL of a parent-RFP culture in each well. This plate was used as the inoculum for  
609 the competitive fitness screen. The remainder of the cultures in the original 96-well plate  
610 were used as the inoculum for the monoculture screen. To quantify competitive fitness,  
611 a titration row of parent-RFP and parent-GFP mixtures in 10% increments (100%  
612 parent-RFP+0% parent-GFP; 90% parent-RFP+10% parent-GFP, etc.) was added to  
613 each plate (Fig. 1D). Since the oxygen limitation that results in stationary cultures  
614 causes cell death in *B. subtilis* [21], we ensured that the library was aliquoted and  
615 spotted within 1 h. For most assays, a Singer ROTOR HDA pinning robot (Singer  
616 Instruments) was used to pin ~1 µL of liquid cultures onto LB or MSgg agar Singer plus  
617 plates (with 35 mL of medium poured on a level surface for co-cultures, or 50 mL of  
618 medium for monocultures), without and with xylose. We used the “spot many” protocol

619 of the Singer ROTOR HDA to mix the wells before spotting and transferred 12 times  
620 from the source liquid plate to the target agar plate. For some assays, a RAININ  
621 Benchsmart 96-well pipetting robot was used rather than the Singer ROTOR HDA to  
622 pipet 1  $\mu$ L onto the agar plates. Agar plates were incubated at 30 °C and placed in a  
623 box or were loosely covered in plastic to reduce drying.

624  
625 When screen outliers (Fig. 2D, 3C) were replicated, strains were streaked for single  
626 colonies, which were inoculated into 200  $\mu$ L of medium in the interior wells of a 96-well  
627 microtiter plate. The exterior wells were inoculated with the parent-GFP control strain,  
628 leaving the top for the parent-GFP+parent-RFP titration. To replicate findings regarding  
629 *alrA*, fresh colonies of the *alrA* knockdown strain and the parent-RFP strain were  
630 inoculated into 5 mL LB in test tubes and cultured on a roller drum at 37 °C to an  
631  $OD_{600} \sim 1.0$ . Equal-volume mixtures of the cultures were spotted along with a parent-  
632 GFP+parent-RFP titration in 12- or 6-well plates.

633

### 634 **Imaging and image analysis of monoculture colonies in the library**

635 Monoculture colonies were imaged using a Canon EOS Rebel T5i EF-S with a Canon  
636 Ef-S 60 mm f/2.8 Macro USM fixed lens. The DSLR camera was set up at a fixed height  
637 in a light box with diffuse lighting from three sides. The lighting and camera settings  
638 were maintained for the duration of the experiment, using the “manual” mode on the  
639 camera. The EOS Utility software was used to run the camera. Plates were imaged  
640 colony side up to avoid imaging through the agar. Images were analyzed using FIJI and  
641 scored as “grew outside original spot”, “did not grow outside original spot”, or “died

642 and/or threw off suppressors.” The ones classified “died and/or threw off suppressors”  
643 were assigned a colony size of 0. Suppressors were identified based on off-center  
644 colonies, often in flower petal-like arrangements in which one or a few cells within the  
645 original spot eventually grew but the majority of the cells did not. Colony size was  
646 measured manually in FIJI by drawing a diagonal line across the diameter of the colony.

647

### 648 **Imaging and image analysis of biofilm co-cultures**

649 A Typhoon™ FLA 9500 scanner was used to image colonies using the multi-plate  
650 drawer. We used ~35 mL of medium with agar on a Singer rectangular plate to be near  
651 the plane of focus when imaging through the agar. GFP (473 nm laser, Long Pass Blue  
652 filter) and RFP (532 nm laser, Long Pass Green filter) signals were acquired.

653

654 For image analysis, Typhoon RFP and GFP images were cropped to contain only one  
655 plate and the image was rotated so that A1 was in the top left corner. Custom Matlab  
656 code was written to read in each plate, divide it into a grid in which each grid cell  
657 contained one colony, and extract the fluorescence level across that grid. The ratio of  
658 the extracted GFP and RFP values was computed for every colony, and the ratio values  
659 for the titration row against the fraction GFP was fitted using the function  $I = aG/(1-bG)$ ,  
660 where  $I$  is the GFP/RFP ratio,  $G$  is the fraction GFP, and  $a$  and  $b$  are fit parameters (Fig.  
661 1D). The fit parameters from the titration row were used to map the library data and  
662 assign assign GFP fractions; the data were normalized so that the average of the  
663 internal parent-RFP and parent-GFP co-culture controls was 1.

664



665 **CRISPRi *rfp* knockdown**

666 Wild-type 3610, the parent-RFP, and the CRISPRi-RFP strains were cultured in 5 mL  
667 test tubes at 37 °C to an  $OD_{600} \sim 1$  in liquid LB. The parent-RFP strain was spotted onto  
668 LB and MSgg agar plates without xylose, while the CRISPRi-RFP strain was spotted  
669 onto LB and MSgg agar in 12-well plates containing 0.0005% to 1% xylose. The RFP  
670 fluorescence of the colonies was imaged as described above, and FIJI was used to  
671 quantify the fluorescence intensity of each colony, using wild-type 3610 as a blank.

672

673 **Wild-type 3610, parent-GFP, and parent-RFP biofilm and non-biofilm colony**  
674 **growth**

675 Wild-type 3610, the parent-GFP, and the parent-RFP strains were cultured in liquid LB  
676 to an  $OD_{600} \sim 1$  at 37 °C. One microliter of each culture was spotted onto LB or MSgg  
677 agar in a 6-well plate. Colonies were cultured for 48 h at 30 °C in a plastic bag with a  
678 wet paper towel to increase humidity. Colonies were imaged using the DSLR setup as  
679 described above.

680

681 **Liquid culture for growth rate analysis**

682 A single colony was used to inoculate 200  $\mu$ L LB in a 96-well microtiter plate.  $OD_{600}$  was  
683 measured every 7.5 min using a Biotek Epoch plate reader at 37 °C.  $OD_{600}$  curves were  
684 blanked and smoothed. The maximum growth rate of each culture was defined as the  
685 maximum derivative of  $\ln(OD_{600})$ .

686

687 **Model of nutrient-dependent colony growth**

688 To determine how competitive fitness in a co-culture colony is affected by differences in  
 689 growth rate, we simulated a reaction-diffusion model in which two cell types with  
 690 densities ( $C_i, i = 1,2$ ) are inoculated in a circular spot from which they spread randomly  
 691 in two dimensions to compete for fresh nutrients ( $n$ ) and grow with distinct maximal  
 692 growth rates ( $M_i$ ), according to the following equations:

$$693 \quad \frac{\partial C_i}{\partial t} = M_i \frac{n}{n+K} C_i + D_c \nabla^2 C_i$$

$$694 \quad \frac{dn}{dt} = -b \sum_i M_i \frac{n}{n+K} C_i + D_n \nabla^2 n.$$

695  $D_c$  is the cell diffusivity,  $D_n$  is the diffusivity of nutrients,  $b$  is a conversion factor dictating  
 696 how nutrients lead to cell growth, and cell growth is limited by nutrients when  $n \sim K$  or  
 697 less. Initially  $n = n_0$  everywhere and, to represent the initial pinning of cells to the agar  
 698 surface,  $C = C_0$  within a disc of radius  $r_0$  and outside of this disc  $C = 0$ .

699

700 The transformations  $\bar{t} = M_1 t$ ,  $\bar{x}_i = \frac{x_i}{\sqrt{\frac{D_c}{M_1}}}$ ,  $\bar{n} = \frac{n}{n_0}$ ,  $\bar{C}_i = \frac{C_i}{n_0/b}$  render the equations

701 dimensionless:

$$702 \quad \frac{\partial \bar{C}_1}{\partial \bar{t}} = \frac{\bar{n}}{\bar{n}+K/n_0} \bar{C}_1 + \nabla^2 \bar{C}_1, \quad \frac{\partial \bar{C}_2}{\partial \bar{t}} = \frac{M_2}{M_1} \frac{\bar{n}}{\bar{n}+K/n_0} \bar{C}_2 + \nabla^2 \bar{C}_2$$

$$703 \quad \frac{d\bar{n}}{d\bar{t}} = -\frac{\bar{n}}{\bar{n}+K/n_0} \bar{C}_1 - \frac{M_2}{M_1} \frac{\bar{n}}{\bar{n}+K/n_0} \bar{C}_2 + \frac{D_n}{D_c} \nabla^2 \bar{n},$$

704 where  $\bar{C}_i$  is the ratio of  $C_i$  compared with its value if cells of type  $i$  consume all available  
 705 nutrients, and  $\bar{n}$  is the ratio of nutrient compared with its initial value (so  $\bar{n}_0 = 1$ ). So, the

706 governing dimensionless parameters are  $\frac{M_2}{M_1}$ ,  $\frac{K}{n_0}$ ,  $\frac{r_0}{\sqrt{\frac{D_c}{M_1}}}$ ,  $\frac{D_n}{D_c}$ , and  $\frac{C_0}{n_0/b}$ .

707

708 Several parameters were estimated from data. The maximal growth rate  $M_1 = 0.0175$   
709  $\text{min}^{-1}$  set the timescale and corresponds to a 40 min doubling time, similar to *B. subtilis*  
710 3610 at 30 °C. The radius of the initial spot (1 mm) set the spatial scale. The ratio of  
711 maximal growth rates  $\frac{M_2}{M_1} = 0.8$  was set to match the ratio in LB for ribosomal  
712 knockdowns compared with wild type (Fig. 2C). We estimated the initial areal density of  
713 cells compared with their saturation density to be  $\frac{c_0}{n_0/b} \approx 10^{-3}$  within the initial spot. To  
714 obtain this estimate, we assumed 1  $\mu\text{L}$  of stationary phase culture spotted  $10^6$  cells over  
715  $\pi \text{ mm}^2$ , and that the spotted cells saturate at a density of  $10^9$  cells/ $\text{mm}^2$  (assuming 1 mL  
716 of stationary phase culture contains  $10^9$  cells [48] and concentrates into  $1 \text{ mm}^3$  when  
717 pelleted, the latter indicating a maximal density of  $10^9$  cells/ $\text{mm}^3$  within a colony with  
718 height 1 mm). We assumed nutrients diffuse much faster than cells such that  $D_n/D_C \approx$   
719 100.

720  
721 The model approximately recapitulates the competitive fitness data (defined in the  
722 model as the ratio of integrated cell densities  $\int C_2 dA / \int C_1 dA$ ) and colony radius at 16 h  
723 when  $D_C \approx 0.003 \text{ mm}^2\text{h}^{-1}$  (Fig. 2E,inset). Results are fairly robust to variation in  $\frac{K}{n_0}$  and  
724  $\frac{D_n}{D_C}$  (Fig. S3C).

725

## 726 **DAVID functional enrichment**

727 We used the DAVID functional annotation tool (<https://david.ncifcrf.gov>) to determine  
728 whether particular gene classes were enriched for each phenotype. The BSU  
729 identification number of the strains identified by our analysis and of the entire CRISPRi

730 library were used as the “list” and the “background,” respectively, using the “locus tag”  
731 option on the website)

732

### 733 **D-amino acid rescue experiments**

734 The unlabelled *alrA* knockdown (HA420) and wild-type 3610 were grown to an  $OD_{600} \sim 1$   
735 in liquid LB. One microliter of each culture was spotted onto MSgg or MSgg-xylose agar  
736 plates with 0.04 mg/mL of one of the D-amino acids. Cultures were incubated for 48 h,  
737 imaging at 24 and 48 h using the DSLR setup described above.

738

### 739 **Liquid growth of *alrA* monocultures and co-cultures for plating efficiency**

740 Cultures of the *alrA* knockdown strain (HA420) and the parent strain (HA2) were  
741 separately cultured from a colony in liquid LB at 37 °C until both strains reached  $OD_{600}$   
742  $\sim 1.0$ . The HA420 and HA2 cultures were mixed 1:1, and the mixture along with the  
743 HA420 monoculture were back-diluted 1:200 into 3 mL MSgg medium with 1% xylose  
744 and incubated at 30 °C, shaking at an angle. At 0 h, 1 h, 2 h, 3 h, 4 h, and 5 h, cultures  
745 were sampled, ten-fold serially diluted, and spotted onto MLS or chloramphenicol  
746 selection plates to determine CFU/mL of each strain (HA2 and HA420 are  $MLS^R$ ,  
747 HA420 is  $cm^R$ , HA2 is  $cm^S$ ). We incubated the dilutions overnight and counted colonies  
748 to calculate CFU/mL.

749

### 750 **Liquid growth of wild-type 3610 and *alrA* knockdowns for microscopy**

751 The 3610 wild-type strain and an unlabelled *alrA* knockdown strain (HA420) were grown  
752 to an  $OD_{600} \sim 1$  in LB. Each strain was back-diluted 1:200 into 3 mL MSgg+1% xylose to

753 fully knock down *alrA* transcription during incubation at 30 °C, shaking at an angle. At 0  
754 and 6 h, 1 µL of each culture were spotted onto 1X PBS pads made with 1.5% agar.  
755 When dry, we added a coverslip and imaged the cells in phase contrast on a Nikon Ti-E  
756 inverted microscope using a 100X objective (NA: 1.4).

757

## 758 **Two-dimensional culturing**

759 Strains were grown in LB to OD<sub>600</sub>~1. While strains grew, we prepared a large agar pad  
760 at least an hour before imaging using the bottom of a rectangular Singer PlusPlate  
761 culture plate and 30 mL of MSgg+1% xylose. After the agar solidified, we added a  
762 second Singer PlusPlate on top to prevent contamination and drying. We mixed the  
763 strains 1:1 volumetrically and spotted 0.5 µL of this mixture onto the agar pad. After the  
764 spot dried, we added a large 113 by 77 mm custom-made no. 1.5 glass coverslip  
765 (Nexterion). The pads were incubated in a plastic bag with a wet paper towel to  
766 maintain humidity at 30 °C for 24 h. The entire spot was captured in a grid of images  
767 using a Nikon Ti-E inverted microscope with a 40X air objective (NA: 0.95) integrated  
768 with µManager [49]. Images were stitched together using custom Matlab (MathWorks)  
769 code. GFP and RFP stitched images were merged using Adobe Photoshop, adjusting  
770 each channel equally.

771

## 772 **Mutualism screen**

773 The mutualism screen (Fig. 5D) was performed as described above, except two screens  
774 were performed side by side: one in which each strain in the *sacA::gfp* library was co-  
775 cultured with the parent-RFP strain (HA12), and one in which each strain was co-

776 cultured with the  $\Delta epsH \Delta tasA$  parent-RFP strain (HA825). These screens were carried  
777 out on MSgg+1% xylose plates with a titration row of HA773 (parent-GFP) in  
778 combination with either HA12 or HA825, as described above.

779

#### 780 **Qualitative fitness determination via dilution streaking**

781 Strains were inoculated from a fresh colony into 5 mL LB and incubated at 37 °C for ~5  
782 h on a roller drum. Cultures were streaked onto agar plates using sterile wooden sticks.  
783 A new sterile stick was used for each streak. These plates were incubated overnight  
784 (~18 h) at 37 °C, and imaged using the DSLR camera setup described above.

785

#### 786 **Statistical Methods**

787 All statistical tests are stated in the figure legends. To determine whether data was  
788 significantly different, Student's unpaired *t*-tests were applied. The Benjamini-Hochberg  
789 multiple tests correction was applied to data in Figures 2C, 3C, and 5B.

790 **Figures**

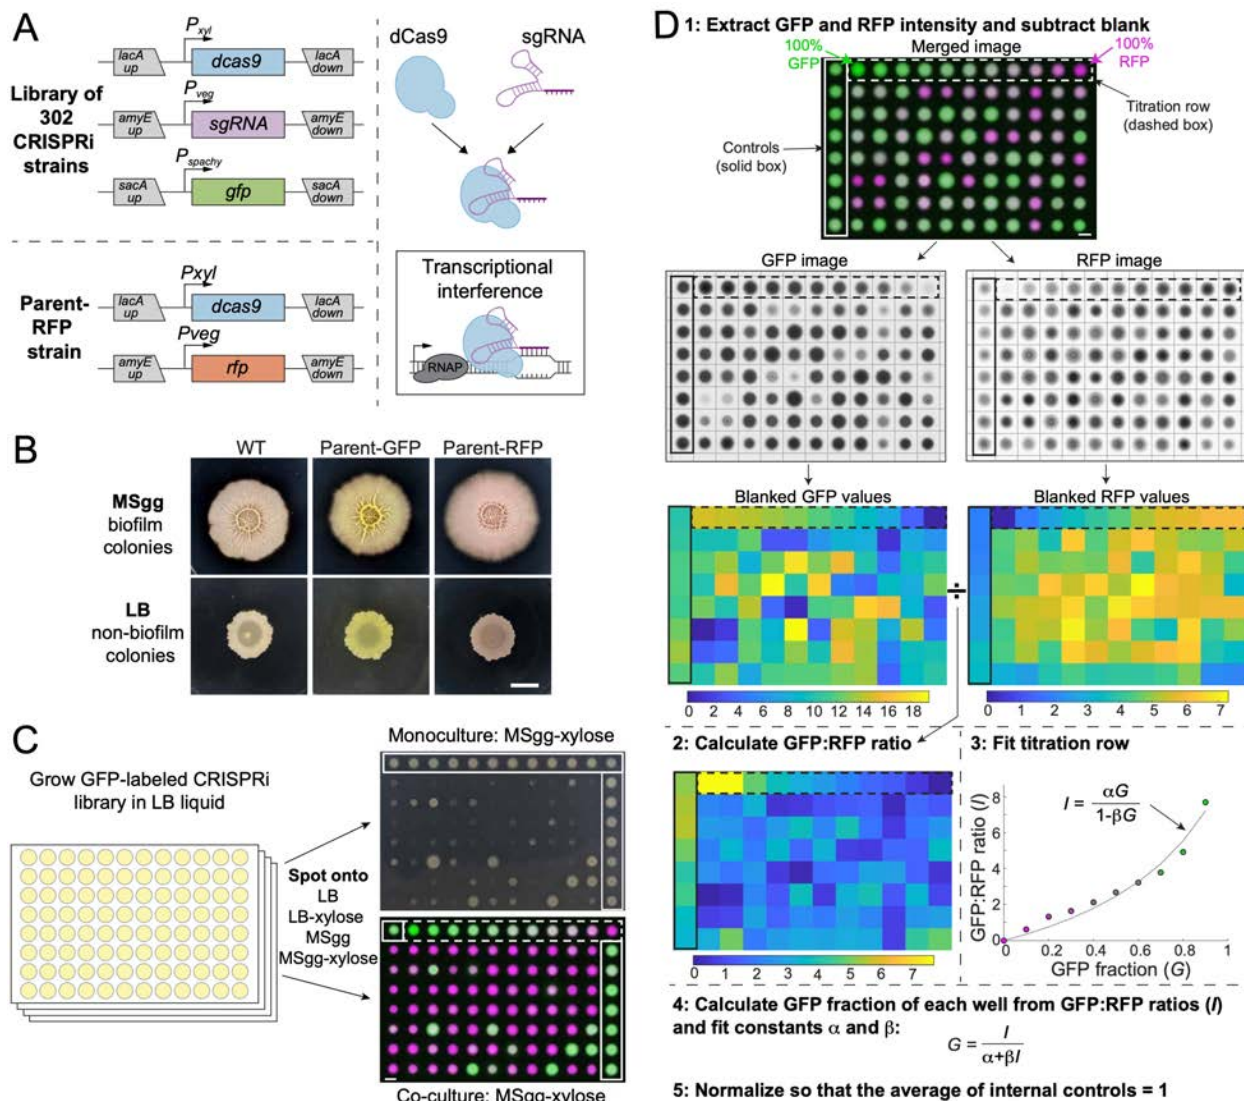

791

792 **Figure 1: A high-throughput screening strategy to measure colony-based**

793 **competition within bacterial colonies.**

794 A) We constructed a GFP-labeled library of CRISPRi knockdowns of all known  
 795 essential and conditionally essential genes (top left). In the library, the nuclease-  
 796 deactivated Cas9 gene (*dcas9*) is inducible with xylose and the single-guide RNA  
 797 (*sgRNA*) is constitutively expressed. dCas9 binds the *sgRNA* and blocks  
 798 transcription by physically impeding RNA polymerase (right). Every strain is



799 labelled with *gfp* expressed from the *sacA* locus. A parent strain (parent-RFP,  
800 bottom left) that expresses *rfp* as well as *dCas9* without an *sgRNA* was used in  
801 competition assays.

802 B) The parent-GFP (*sacA::gfp*, *lacA::dCas9*) and the parent-RFP strains have  
803 similar phenotypes to wild type on both biofilm-promoting MSgg agar and non-  
804 biofilm-promoting LB agar. Cultures were grown in liquid LB to an  $OD_{600} \sim 1$  and  
805 then 1  $\mu$ L was spotted in the middle of wells of a 6-well plate containing LB agar  
806 or MSgg agar. Image intensities were adjusted identically; the yellow and red  
807 colors of the parent strains are due to GFP and RFP expression, respectively.  
808 Scale bar: 5 mm.

809 C) Schematic of screening strategy to measure the monoculture colony size and  
810 competitive fitness of each knockdown against the parent-RFP strain. GFP-  
811 labeled knockdown libraries were grown in liquid culture in 96-well microtiter  
812 plates. Monocultures were spotted onto LB and MSgg agar plates (top right)  
813 without or with xylose to achieve basal or full knockdown, respectively, of the  
814 targeted gene. The monocultures contain parent controls in wells along an outer  
815 column and row of the plate (solid box). Co-cultures of a 1:1 volumetric mixture of  
816 the parent-RFP and GFP-labeled library strains were spotted onto agar plates of  
817 LB and MSgg, without or with xylose. Controls in which parent-GFP was mixed  
818 with parent-RFP are bounded by horizontal red box. Bottom right: merged image  
819 of RFP and GFP signals from co-cultures. The co-cultures include a titration row  
820 from 100% GFP cultures to 100% RFP cultures in 10% increments (dashed box),



821 and several controls of 1:1 mixtures of the parent GFP and parent-RFP strains  
822 (purple box). Scale bar: 5 mm.

823 D) Schematic of image analysis to quantify competitive fitnesses from the co-culture  
824 screen. Data from plate 1 spotted on MSgg is presented as an example. Plates  
825 were segmented and individual colony intensities were extracted from the GFP  
826 and RFP images. GFP intensities were divided by RFP intensities to obtain ratios  
827  $I$ . The titration row (dashed box) was fit to a curve using the equation  $I = \alpha G / (1 -$   
828  $\beta G)$ , where  $G$  is the fraction of the parent-GFP strain, to extract fit parameters  $\alpha$   
829 and  $\beta$  for each plate individually. These parameters were used to map the GFP  
830 fractions of each colony and values were normalized so that the parent-  
831 GFP:parent-RFP control co-cultures on each plate (solid box) had an average  
832 value of 1. Scale bar: 5 mm.

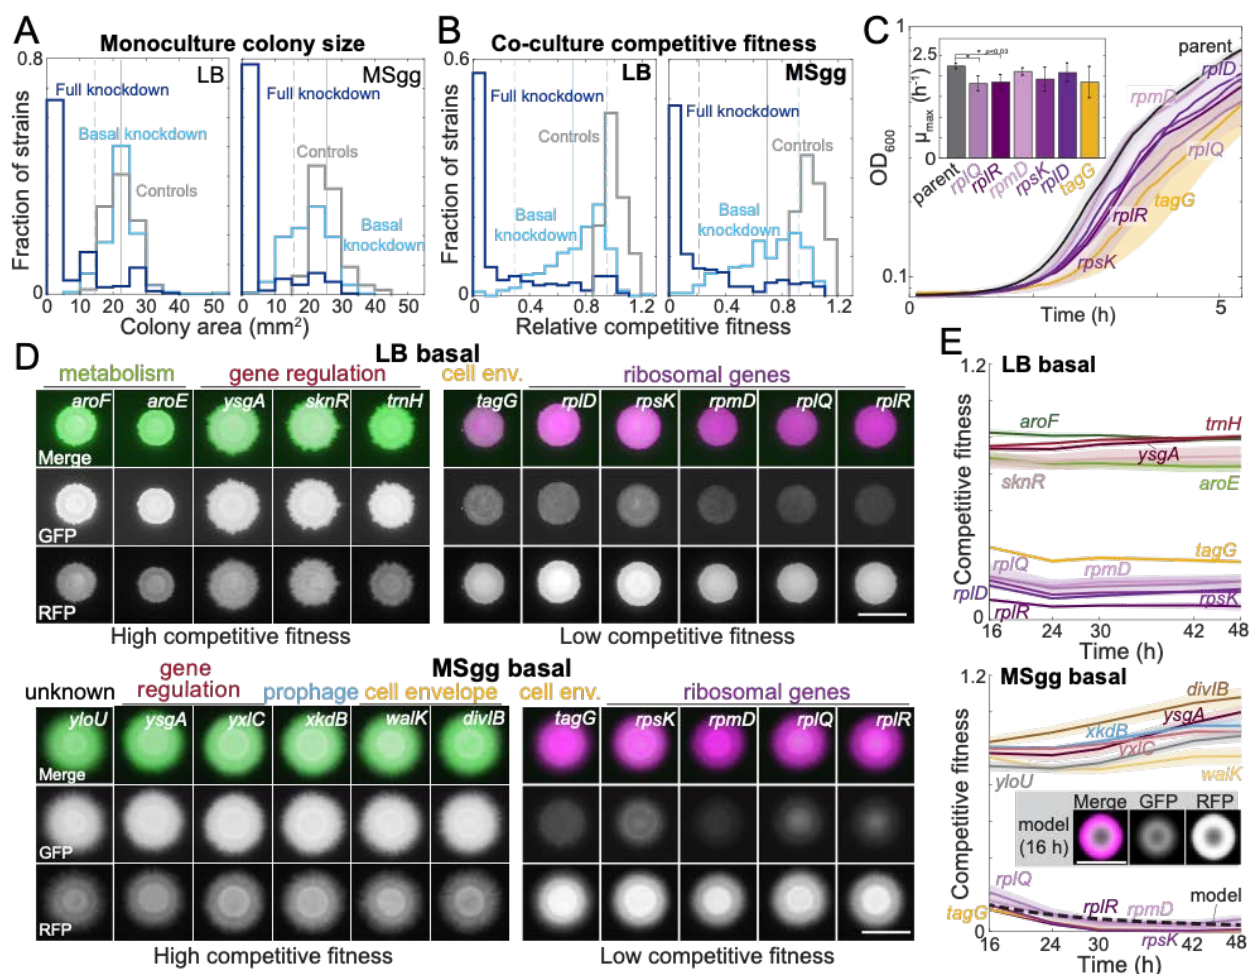

833

834 **Figure 2: Growth on biofilm-promoting medium, increased knockdown, and**  
 835 **competition against parent-RFP all broaden the distribution of fitnesses across**  
 836 **the library.**

837 A) Basal knockdown (light blue) of essential genes on LB agar (which does not  
 838 promote biofilms) resulted in similar colony sizes as parent-GFP controls (gray);  
 839 only 13 of 302 colonies had size two standard deviations below the mean of the  
 840 controls. By contrast, on biofilm-promoting MSgg agar the distribution of colony  
 841 sizes spread to smaller values, with 80 colonies more than 2 standard deviations  
 842 below the mean of the controls. Full knockdown (dark blue) inhibited growth of  
 843 most strains. Data are from measurements at 16 h using the *sacA::gfp* library.

844 Vertical solid lines show the mean of the control distribution and dashed lines  
845 show two standard deviations below the mean.

846 B) 17 (LB) and 11 (MSgg) knockdown strains in the library competed poorly against  
847 the parent-RFP strain at basal knockdown (light blue), while 41 (LB) and 46  
848 (MSgg) had competitive fitness similar to parent-GFP+parent-RFP controls (gray)  
849 even at full knockdown (dark blue). Data are from competition ratios at 16 h using  
850 the *sacA::gfp* library. Low-fitness strains were defined as having fitness two  
851 standard deviations below the mean of the data, and neutral-fitness strains were  
852 defined as having fitness above one standard deviation of the mean of the data.

853 Vertical solid lines show the mean and dashed lines show two standard  
854 deviations below the mean and one standard deviation above the mean of the  
855 data from basal knockdown.

856 C) Strains with low competitive fitness for basal knockdown generally had lower  
857 growth rate in liquid monoculture than parent control strains. Colonies were  
858 inoculated into liquid LB and OD<sub>600</sub> was monitored over time. Ribosome-related  
859 genes are shown in shades of purple and a cell envelope-related gene (*tagG*) is  
860 shown in yellow. Curves are means and shaded regions represent 1 standard  
861 deviation ( $n=3$ ). Inset: maximum growth rates. \*:  $p<0.03$ , Student's unpaired *t*-  
862 test, Benjamini-Hochberg multiple test correction applied.

863 D) On both LB and MSgg agar, basal knockdown of *ygsA*, which is involved in gene  
864 regulation, exhibited high competitive fitness (left) and *tagG* and ribosomal-gene  
865 knockdowns exhibited low competitive fitness (right). GFP (knockdown strain) is

866 false-colored green and RFP (parent) is false-colored magenta. Images are from  
867 16 h using the *sacA::gfp* library. Scale bar: 5 mm.

868 E) Competitive fitness of the strains with the highest and lowest values was  
869 approximately constant after 16 h. Curves are means and shaded regions  
870 represent the standard error of the mean ( $n=3$  independent measurements).  
871 Inset and dashed black line: A reaction-diffusion model of co-culture colony  
872 growth with physically realistic parameters indicates that knockdowns (magenta)  
873 with maximum growth rate 20% lower than the parent (green) reproduces the  
874 colony sizes (bottom, inset) and competitive fitness (bottom, dashed black line) of  
875 ribosomal protein knockdowns after 16 h (Methods, Fig. S3C).



879 A) Although most knockdowns had similar fitness on LB and MSgg agar, a subset of  
880 knockdowns had higher competitive fitness on LB agar than on MSgg agar, or  
881 vice versa. Genes with fitness difference  $>0.24$  at 24 h or  $>0.3$  at 48 h are  
882 annotated and colored in orange shades, while those below the cutoff are in  
883 grayscale and parent-RFP+parent-GFP co-culture controls are in shades of  
884 purple. Genes labeled in bold were selected for follow-up studies. Data are from  
885 the *sacA::gfp* library at 16, 24, and 48 h. The solid line is  $y=x$  and the dotted lines  
886 represent the chosen cutoff.

887 B) Images of colonies of the bolded genes in (A) after 48 h that illustrate the  
888 differential competitive fitness between LB and MSgg. Green and magenta  
889 represent fluorescence from the gene knockdown and parent, respectively. Scale  
890 bar: 5 mm.

891 C) Addition of specific nutrients to the medium with poorer competitive fitness  
892 rescued competitive fitness for the *mntA*, *glyA*, and *mgtE* knockdowns. Means  
893 (filled circles) of triplicates (shown at end of lines extending from the circle) are  
894 displayed. Parent-RFP+parent-GFP controls are shown as gray filled circles.  
895 Data from addition experiments (LB+manganese, LB+magnesium, and  
896 MSgg+glycine for *mntA*, *mgtE*, and *glyA*, respectively) are shown as colored  
897 circles and lines at the ends of arrows. All changes marked with arrows are  
898 significant after correcting for multiple hypotheses with the Benjamini-Hochberg  
899 method ( $p < 0.01$ , Student's unpaired *t*-test).

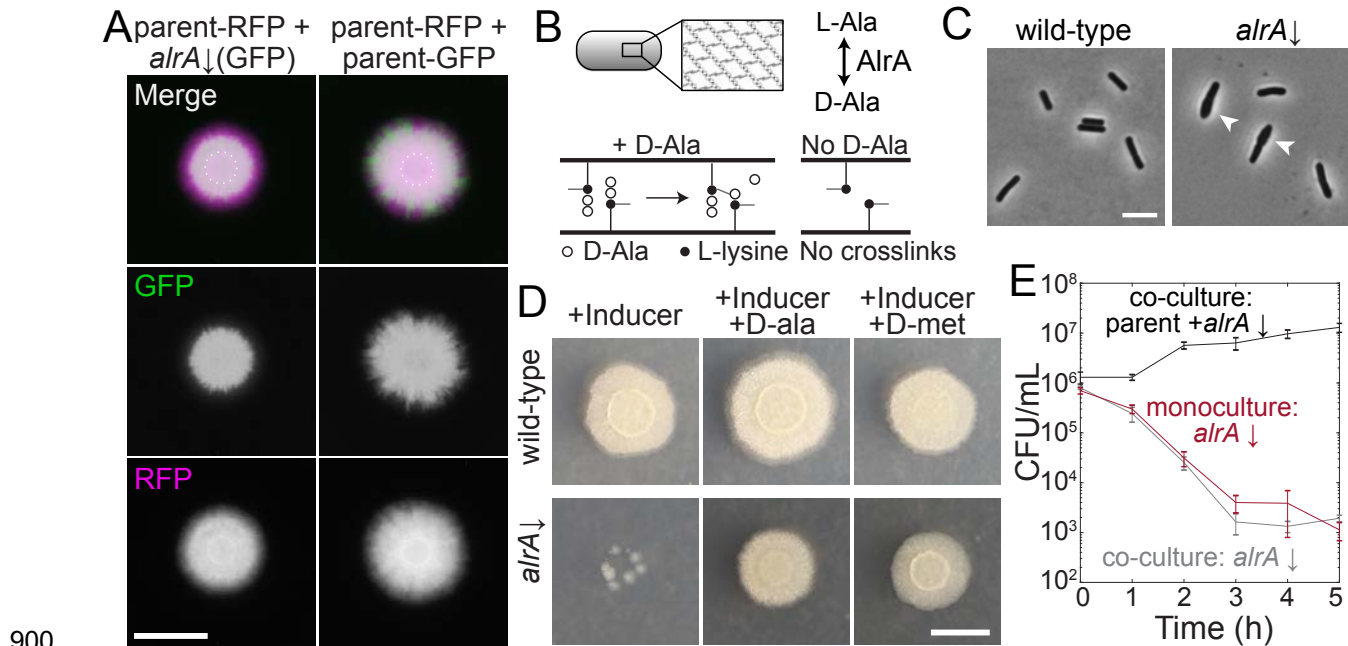

900

901 **Figure 4: Full knockdown of *alrA* is rescued in a biofilm by D-alanine nutrient**

902 **sharing, but not in liquid culture.**

903 A) Left: the *sacA::gfp alrA* knockdown under full induction was rescued by growth

904 with the parent-RFP strain under biofilm-promoting conditions (MSgg agar). The

905 *alrA* knockdown expanded beyond the boundaries of the original inoculum

906 (dashed circle) when grown in co-culture with the parent-RFP strain. Right: the

907 control co-culture of parent-RFP with parent-GFP preserves both strains at

908 approximately equal proportions. Images were acquired at 24 h. In merged

909 images, GFP from the *alrA* knockdown is false-colored green and RFP from the

910 parent-RFP strain is false-colored magenta. Scale bar: 5 mm.

911 B) AlrA is a racemase that converts L-alanine to D-alanine. D-alanine is critical for

912 cell-wall crosslinking.



913 C) Full knockdown of *alrA* caused cells to bulge, signifying cell-wall defects. Cells  
914 were cultured for 6 h in liquid MSgg with xylose to fully inhibit *alrA* expression.  
915 Arrowheads indicate bulging cells. Scale bar: 5  $\mu$ m.

916 D) Full knockdown of *alrA* was rescued by exogenous D-alanine. Cultures were  
917 grown in liquid LB to an  $OD_{600} \sim 1$  and then 1  $\mu$ L was spotted on MSgg agar alone  
918 or supplemented with 0.04 mg/mL D-alanine or D-methionine. Cells from *alrA*  
919 monocultures mostly died (left); the small colonies represent suppressors present  
920 in the initial inoculum. By contrast, addition of D-alanine (middle) or D-methionine  
921 (right) resulted in comparable growth to wild-type. Images are of an unlabeled  
922 *alrA* knockdown (HA420) and were acquired after 24 h of growth. Scale bar: 5  
923 mm.

924 E) Full knockdown of *alrA* was not rescued when co-cultured with the parent-RFP  
925 strain in liquid. For the co-culture, parent and *alrA* knockdown cultures were  
926 mixed 1:1 and back-diluted 1:100 into liquid MSgg with xylose to fully deplete  
927 *alrA*. For the *alrA* knockdown monoculture, the culture was diluted 1:200 into  
928 liquid MSgg with xylose so that the starting inoculum of the *alrA* strain was  
929 equivalent to that of the co-culture. CFU/mL of the *alrA* knockdown were not  
930 significantly different between the monoculture (dark red) and co-culture (gray)  
931 throughout the course of the experiment ( $p$ -values from each timepoint range  
932 from 0.21 to 0.66, student's unpaired  $t$ -test). The black line is the total CFU/mL of  
933 the parent/*alrA* knockdown co-culture.  $n=3$ , error bars represent 1 standard error  
934 of the mean.



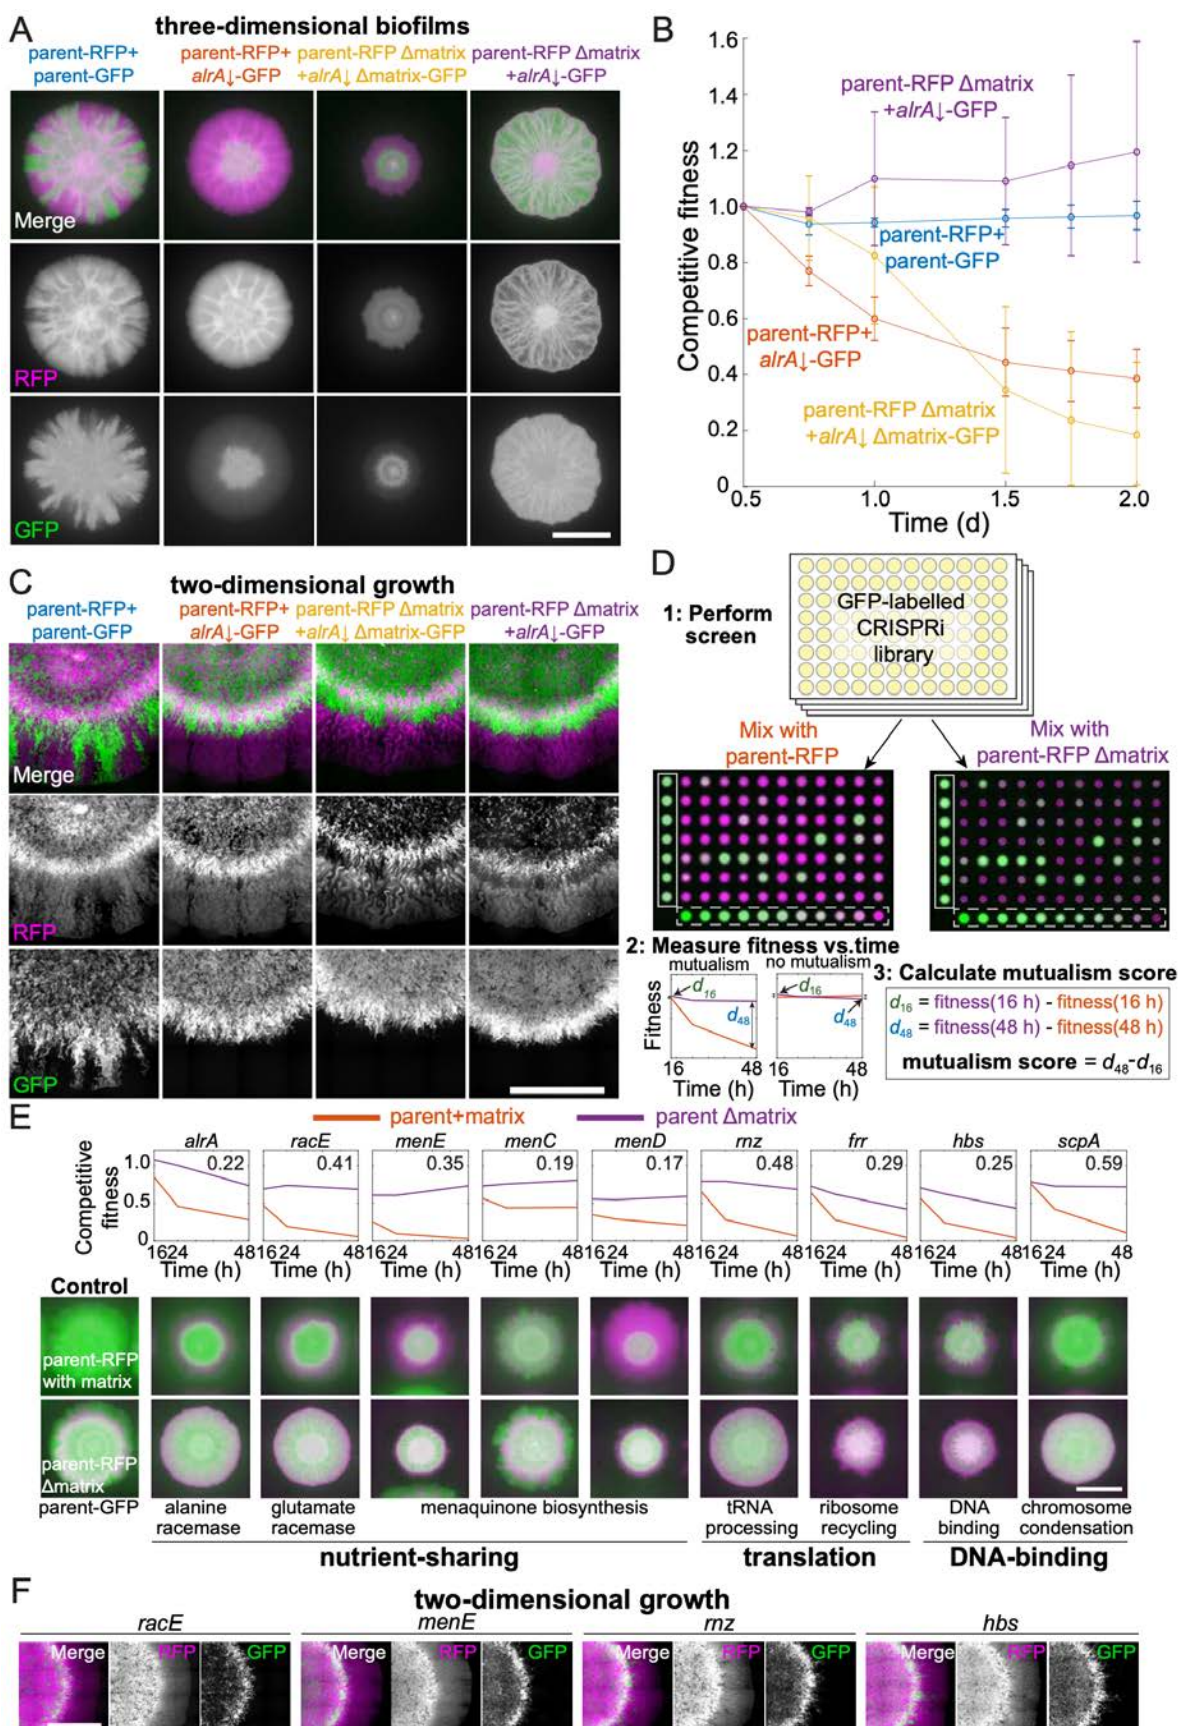

936 **Figure 5: Mutualisms emerge when a nutrient-deficient mutant is the sole**  
937 **provider of extracellular matrix.**

938 A) Extracellular matrix is not required for *alrA* rescue (third column), and rescue is  
939 enhanced when the *alrA* full knockdown is combined with a matrix-deficient  
940 parent strain (fourth column). In the left column, the parent-GFP strain is false-  
941 colored in green, and in the other columns the *alrA* knockdown strain is green.  
942 The parent-RFP strain is false-colored in magenta. In the first two columns, both  
943 strains express matrix proteins. In the third column, both strains lack *epsH* and  
944 *tasA*, which encode key matrix components. In the fourth column, *epsH* and *tasA*  
945 are deleted from the parent-RFP strain while the *alrA* knockdown produces  
946 matrix. Images were acquired after 48 h of growth. Scale bar: 5 mm.

947 B) The competitive fitness of the *alrA* full knockdown decreased over time when  
948 both strains or neither produce matrix, while fitness remained 1 (equal  
949 proportions of the two strains) and stable over time in co-cultures when the  
950 parent is matrix-deficient. The matrix-deficient parent-RFP+*alrA* knockdown  
951 (purple) and the parent-RFP+parent-GFP control (blue) data were not  
952 significantly different ( $p > 0.2$  at all time points); nor were the parent-RFP+*alrA*  
953 knockdown (orange) and the matrix-deficient parent-RFP+matrix-deficient *alrA*  
954 knockdown (yellow) data ( $p > 0.07$ , Student's *t*-test). The matrix-deficient parent-  
955 RFP+*alrA* knockdown (purple) data are significantly higher than the parent-  
956 RFP+*alrA* knockdown (orange) at all time points following 0.5 d ( $p < 0.014$ ). Data  
957 were normalized so that the 0.5 d timepoint is set to 1. Curves are means and  
958 error bars represent 1 standard deviation ( $n = 2-3$  biological replicates). Statistical

959 analysis: Student's unpaired *t*-test, Benjamini-Hochberg multiple tests correction  
960 applied.

961 C) Cells with full knockdown of *alrA* were outcompeted by the parent-RFP strain  
962 during two-dimensional growth. Co-cultures were spotted on a MSgg-xylose agar  
963 pad and limited to growth in a layer with thickness one cell by applying a cover  
964 slip over the cells. Images were acquired after 24 h of growth. Scale bar: 0.4 mm.

965 D) Design of screen to identify mutants that exhibit an increase in fitness when co-  
966 cultured with a matrix-deficient parent on MSgg-xylose agar. The *sacA::gfp*  
967 library was used in this screen; plate 3 from the 16 h timepoint is shown. The  
968 distance between the centers of each colony is 9 mm. White box, controls; white  
969 dashed box, titration row.

970 E) Full knockdowns that exhibited mutualism generally involve genes related to  
971 nutrient sharing, translation, and DNA-binding. Top: competitive fitness of co-  
972 cultures with the wild-type parent-RFP (purple) and matrix production-deficient  
973 parent (red) at 16, 24, and 48 h. Numbers in the top right indicate the mutualism  
974 score. Bottom: merged images of biofilm-colony co-cultures on MSgg-xylose  
975 agar at 48 h. Scale bar: 5 mm.

976 F) Full knockdowns that exhibited mutualism in three-dimensional biofilms were out-  
977 competed by the matrix-deficient parent-RFP strain when growth was limited to  
978 two dimensions as in (C). Images were acquired after 24 h of growth. Scale bar:  
979 0.4 mm.

980 For (A,C-F), GFP is false-colored in green and RFP is false-colored in magenta.

981 **Supplemental Figures**

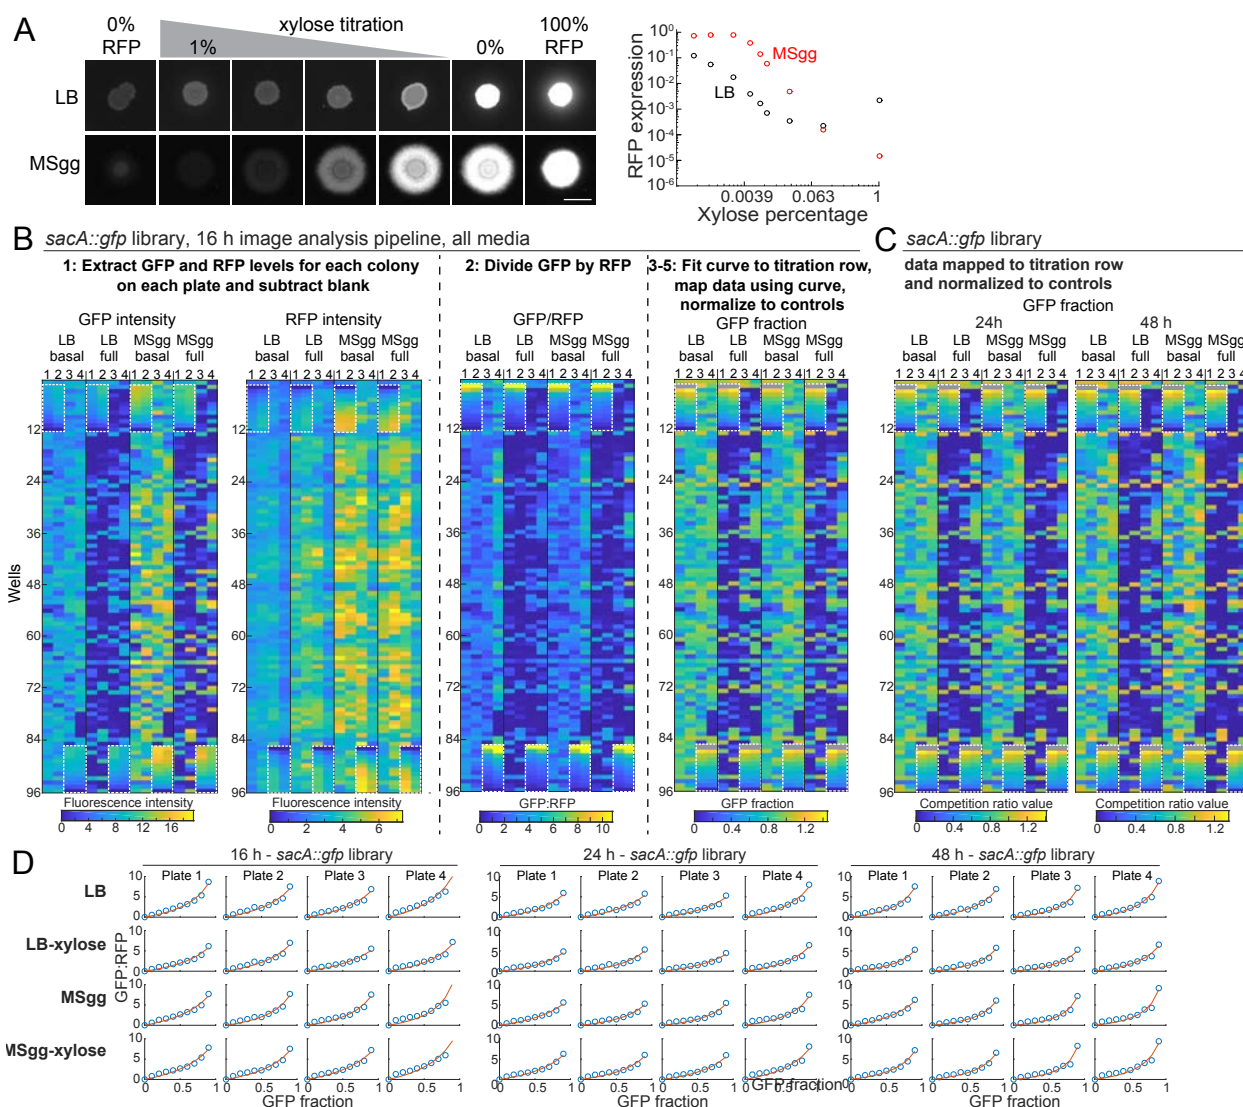

982

983 **Figure S1: CRISPRi is an efficient tool for tunable knockdown of gene expression**  
 984 **in non-biofilm and biofilm colonies, enabling high-throughput competition**  
 985 **screens.**

986 A) Varying CRISPRi induction generates titrated gene expression in colonies on LB  
 987 and on the biofilm-promoting medium MSgg. We spotted a strain with CRISPRi  
 988 targeting *rfp* onto LB or MSgg agar plates with various amounts of xylose xylose.  
 989 Left: images were acquired after 24 h of growth. Right: RFP levels varied



990 inversely with xylose concentration, with basal repression minimally decreasing  
991 expression of RFP and higher levels of xylose repressing expression by 10- to  
992 1000-fold in LB and ~10,000-fold in MSgg. Data were normalized to RFP levels  
993 in a strain without a CRISPRi sgRNA (100% RFP). Scale bar: 5 mm.

994 B) Competition data for the entire *sacA::gfp* library after 16 h of growth at each step  
995 of the analysis pipeline. The titration row is denoted by white dashed boxes. The  
996 few gray boxes represent empty wells or wells that involved division by zero  
997 during processing and hence were ignored.

998 C) Competition data for the *sacA::GFP* library after 24 h and 48 h of growth. The  
999 titration row is denoted by white dashed boxes. The few gray boxes represent  
1000 empty wells or wells that involved division by zero during processing and hence  
1001 were ignored.

1002 D) Data from the titration row of parent-GFP and parent-RFP co-cultures were well  
1003 fit by the predicted equation  $I = aG / (1 - bG)$  (red lines, Fig. 1D). Blue open circles  
1004 show the ratio of GFP:RFP intensities of the 0-90% GFP (100-10% RFP)  
1005 colonies plotted against the fraction of GFP for each plate of each library at each  
1006 time point in (B,C).

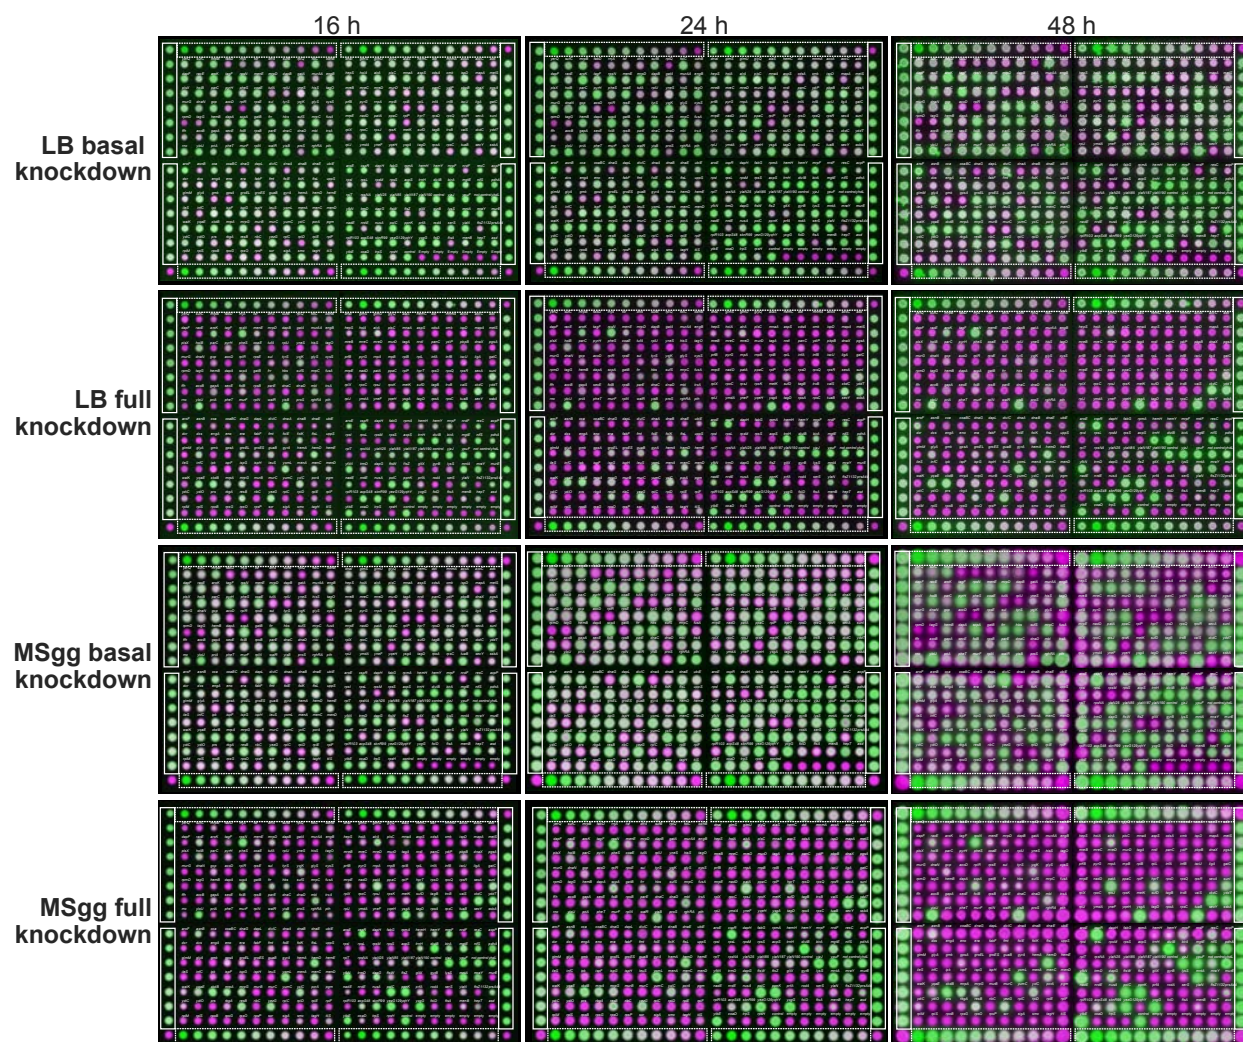

1007

1008 **Figure S2: Images of plates from the competition screen with the *sacA::GFP***

1009 **library.**

1010 Merged images from the competition screen on LB and MSgg agar under basal and full

1011 knockdown, at 16, 24, and 48 h. The CRISPRi strains and parent-GFP controls are

1012 false-colored in green and the parent-RFP is false-colored in magenta. The dashed

1013 boxes show the titration row of each plate and the solid boxes show the parent-GFP +

1014 parent-RFP controls. The distance between the centers of neighboring colonies is 9

1015 mm.



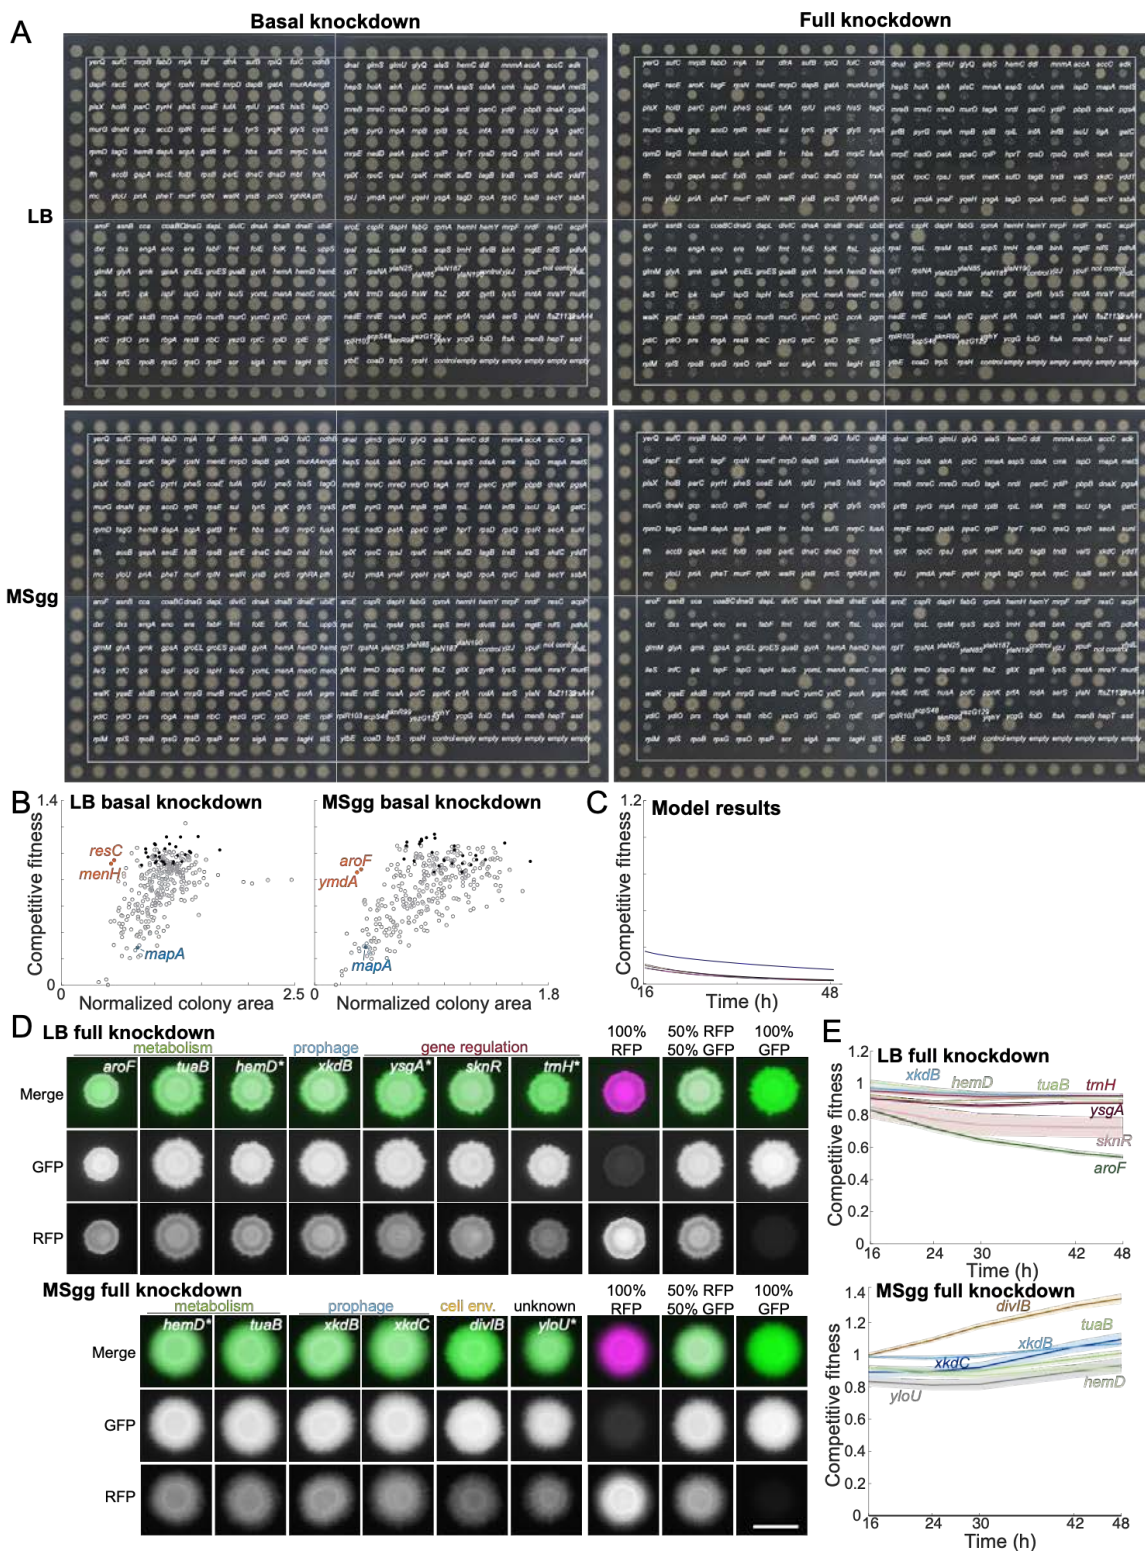

1016

1017 **Figure S3: Monoculture colony size screen, and analysis of knockdowns with low**

1018 **and high competitive fitness.**

- 1019 A) Monoculture colonies on MSgg agar (basal knockdown) exhibited more variation  
1020 in size than monoculture colonies on LB agar after 16 h of growth. With full  
1021 knockdown, there were many small (relative to controls) monoculture colonies on  
1022 LB and on MSgg after 16 h. The CRISPRi library is within the white boxes and  
1023 colonies outside of the boxes are parent-GFP controls. The distance between the  
1024 centers of neighboring colonies is 9 mm. Data for colony areas is in Table S2.
- 1025 B) A few knockdowns exhibited high competitive fitness in co-culture despite having  
1026 reduced colony sizes in monoculture in basal knockdown conditions (orange),  
1027 and one non-essential gene knockdown in the library had reduced competitive  
1028 fitness (blue). The rest of the library are in gray and the controls are in black.
- 1029 C) The reaction-diffusion model of colony growth (Methods) recapitulates  
1030 competitive fitness when  $D_C = 0.003 \text{ mm}^2 \text{ h}^{-1}$  and  $M_1/M_2 = 0.8$ ; competitive fitness  
1031 is insensitive to changes in  $K/n_0$  and  $D_n/D_C$ . Parameters  $M_1 = 0.0175 \text{ min}^{-1}$ ,  $r_0 = 1$   
1032 mm, and  $C_0/(n_0/b) = 0.001$  are estimates from data. The black line shows the  
1033 simulated competitive fitness corresponding to the colony in the inset of Fig. 2E  
1034 in which both competitive fitness and colony size data were recapitulated with  
1035  $K/n_0 = 0.05$  and  $D_n/D_C = 100$ . Competitive fitness was largely unchanged if  $D_n/D_C$   
1036 = 1000 (dark pink, partly beneath black line) or  $D_n/D_C = 10$  (light pink, partly  
1037 beneath black line), or if  $K/n_0 = 1.0$  (dark blue) or  $K/n_0 = 0.05$  (light blue, partly  
1038 beneath black line).
- 1039 D) Strains that competed well at full knockdown included genes related to  
1040 metabolism, gene regulation, prophage, and cell envelope (*divIB*), along with  
1041 *yloU*, a gene of unknown function. Merged images show the parent-RFP false-



1042 colored in magenta and the knockdown strain false-colored in green. The 100%  
1043 parent-RFP, 50% parent-RFP+50% parent-GFP, and 100% parent-GFP controls  
1044 are shown to the right of the knockdowns. Scale bar: 5 mm.

1045 E) Competitive fitnesses of the knockdowns with the highest fitnesses at 16 h were  
1046 mostly stable over time with full CRISPRi induction. Curves are means and  
1047 shaded regions represent 1 standard error of the mean ( $n=3$  biological  
1048 replicates).

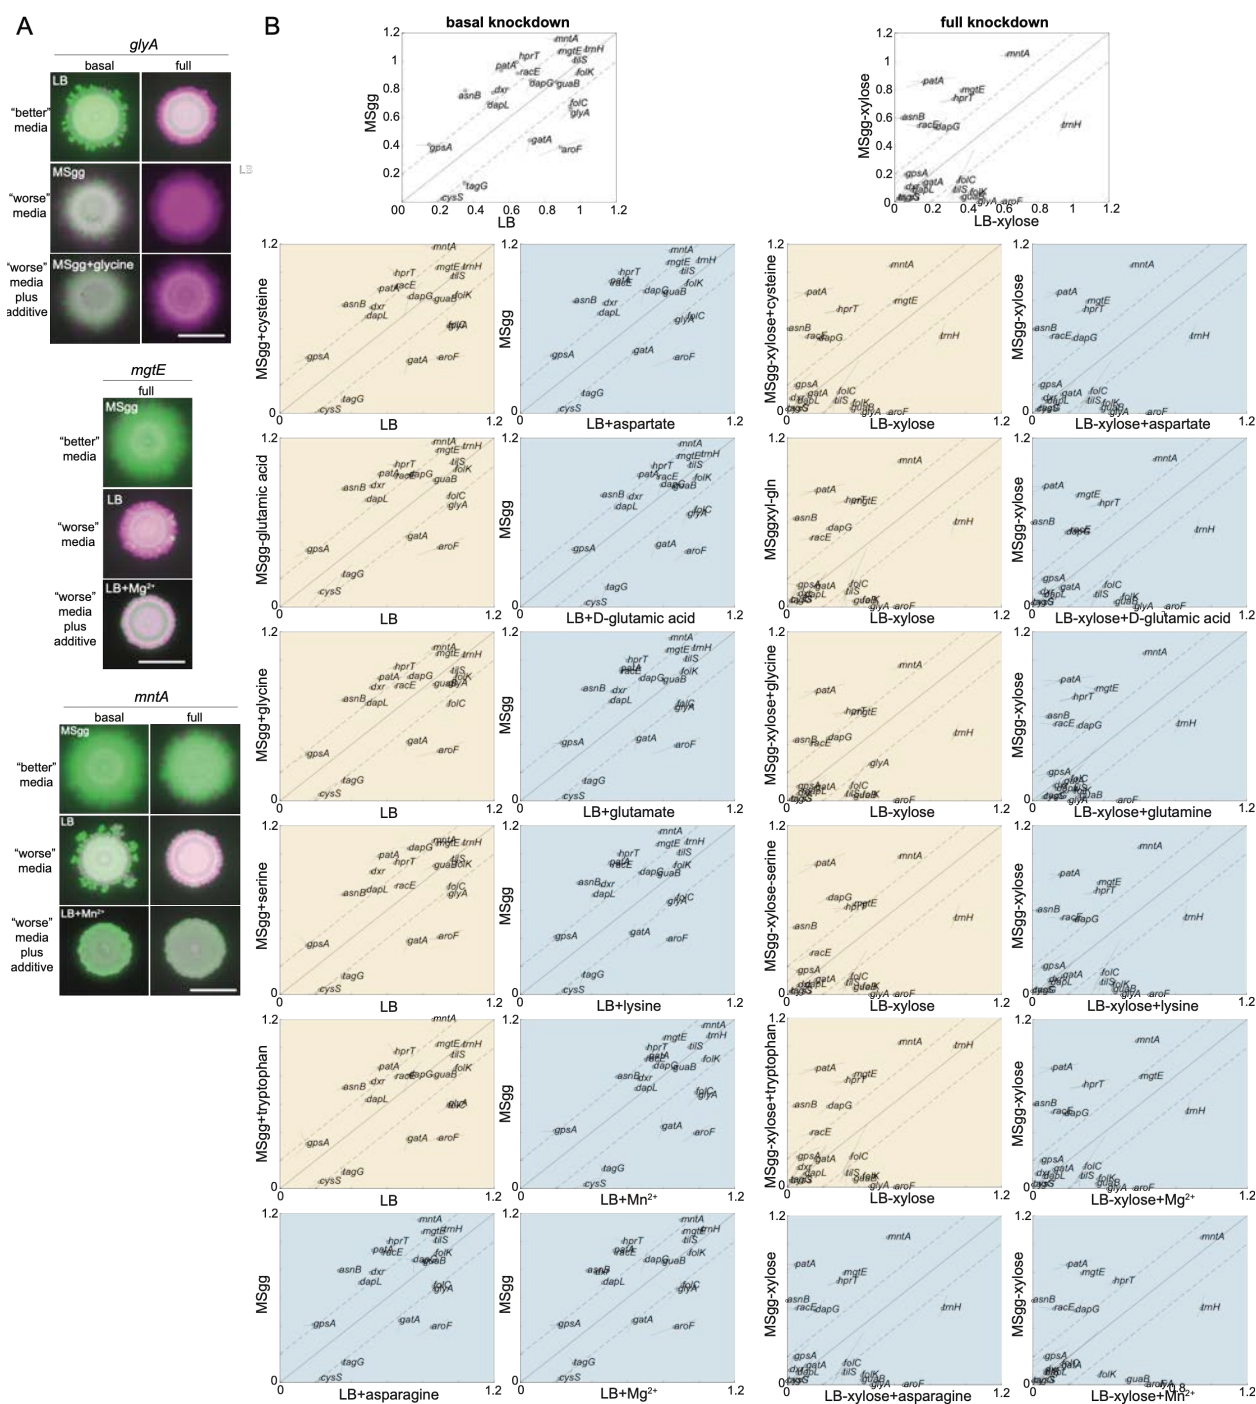

1049

1050 **Figure S4: Many nutrients do not impact the competitive fitness of knockdowns**  
 1051 **with different phenotypes between MSgG agar and LB agar.**

1052 A) The competitive fitness of *glyA*, *mgtE*, and *mntA* knockdowns improved when

1053 glycine was added to MSgG agar, Mg<sup>2+</sup> was added to LB agar, or Mn<sup>2+</sup> was

1054 added to MSgg agar, respectively. Images are merges of fluorescence from the  
1055 knockdown (false-colored in green) and the parent-RFP (false-colored in  
1056 magenta) after 48 h. Scale bar: 5 mm.

1057 B) Many nutrients did not alter competitive fitness. Baseline competitive fitness  
1058 values (top row) versus when a nutrient was added to MSgg agar (yellow) or LB  
1059 agar (blue). Means are displayed as black circles, with each replicate at the end  
1060 of the lines extending from the circle. Data are from the 48 h time point.

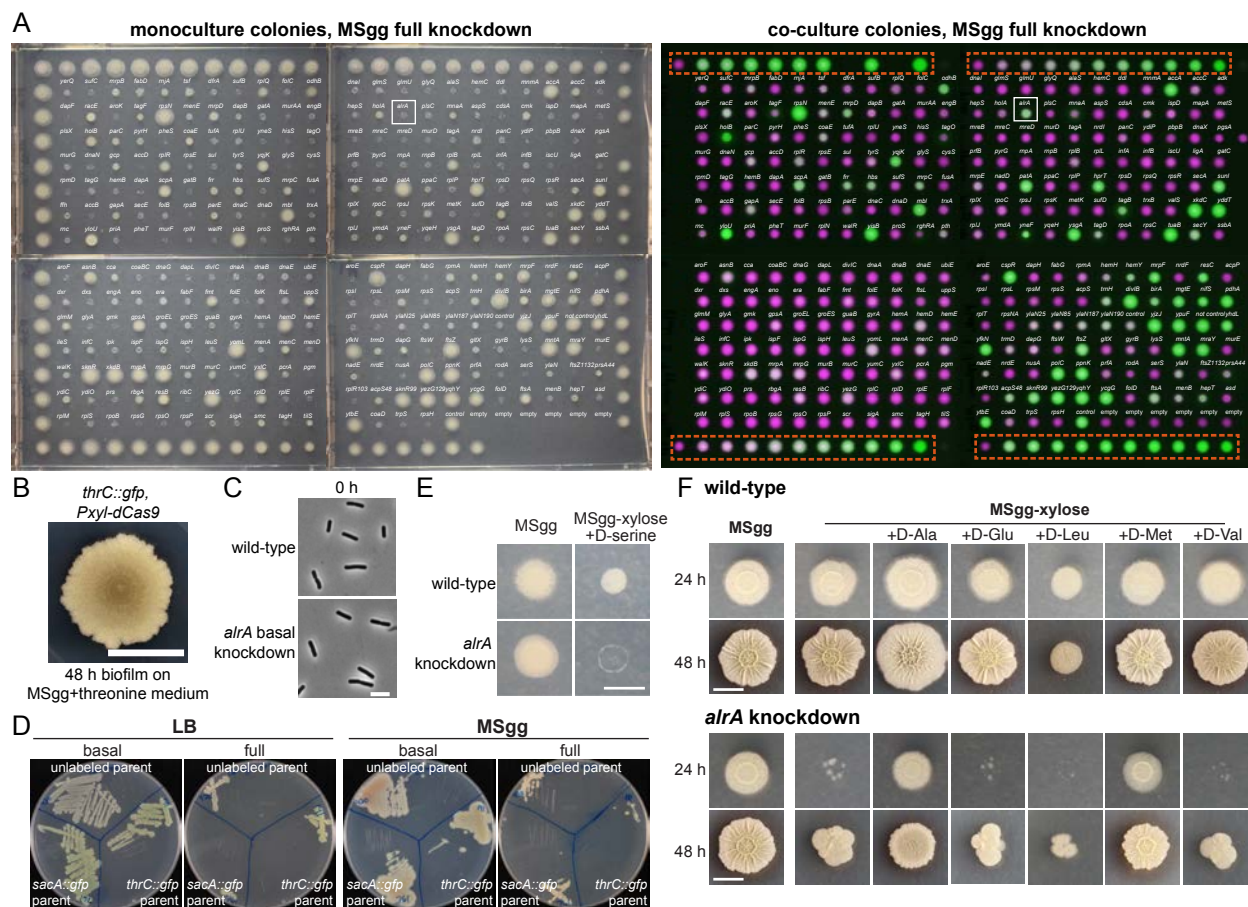

1061

1062 **Figure S5: Under full induction, the *alrA* knockdown dies as a monoculture**

1063 **colony but grows when co-cultured with the wildtype-like parent.**

1064 A) A screen under full CRISPRi induction for knockdowns that die as monoculture

1065 colonies (left) but survive in co-culture (right) highlighted *alrA* (white box). Left:

1066 monoculture colonies of the *thrC::gfp* library on MSgg-xylose; outer colonies are

1067 *thrC::gfp* parent controls. Right: merged images of co-cultures of the *thrC::gfp*

1068 CRISPRi library (false-colored in green) with the parent-RFP strain (false-colored

1069 in magenta). The titration row is indicated by the red dashed box. The distance

1070 between the centers of two neighboring colonies is 9 mm.

- 1071 B) The *thrC::gfp* parent strain did not form wrinkles. One microliter of an LB liquid  
1072 culture ( $OD_{600} \sim 1$ ) was spotted onto an MSgg-threonine plate and incubated at 30  
1073 °C for 48 h. Scale bar: 5 mm.
- 1074 C) Cells with basal knockdown of *alrA* are rod-shaped, similar to wild type. Images  
1075 were taken directly before adding xylose to fully deplete cells of *alrA* for 6 h, as  
1076 shown in Figure 4C. Scale bar: 5  $\mu$ m.
- 1077 D) Full knockdown of *alrA* resulted in a growth defect. Cultures were grown and  
1078 streaked out onto LB and MSgg plates with and without xylose to qualitatively  
1079 observe growth under basal and full knockdown. A standard (100-mm) cell  
1080 culture dish is shown.
- 1081 E) D-serine inhibited the growth of wild-type colonies and did not rescue growth of  
1082 the *alrA* knockdown. The colony was imaged through agar (to avoid having the  
1083 objective contact the colony) after 24 h. D-serine was supplemented at 0.04  
1084 mg/mL. Scale bar: 5 mm.
- 1085 F) Most D-amino acids did not restore the growth of *alrA*-depleted cells. D-Leu  
1086 inhibited the growth of wild-type colonies (top). Only D-alanine and D-methionine  
1087 restored growth of full *alrA* knockdown (bottom). D-amino acids were  
1088 supplemented at 0.04 mg/mL. We did not test D-Ile, D-Phe, D-Thr, or D-Tyr.  
1089 Scale bar: 5 mm.



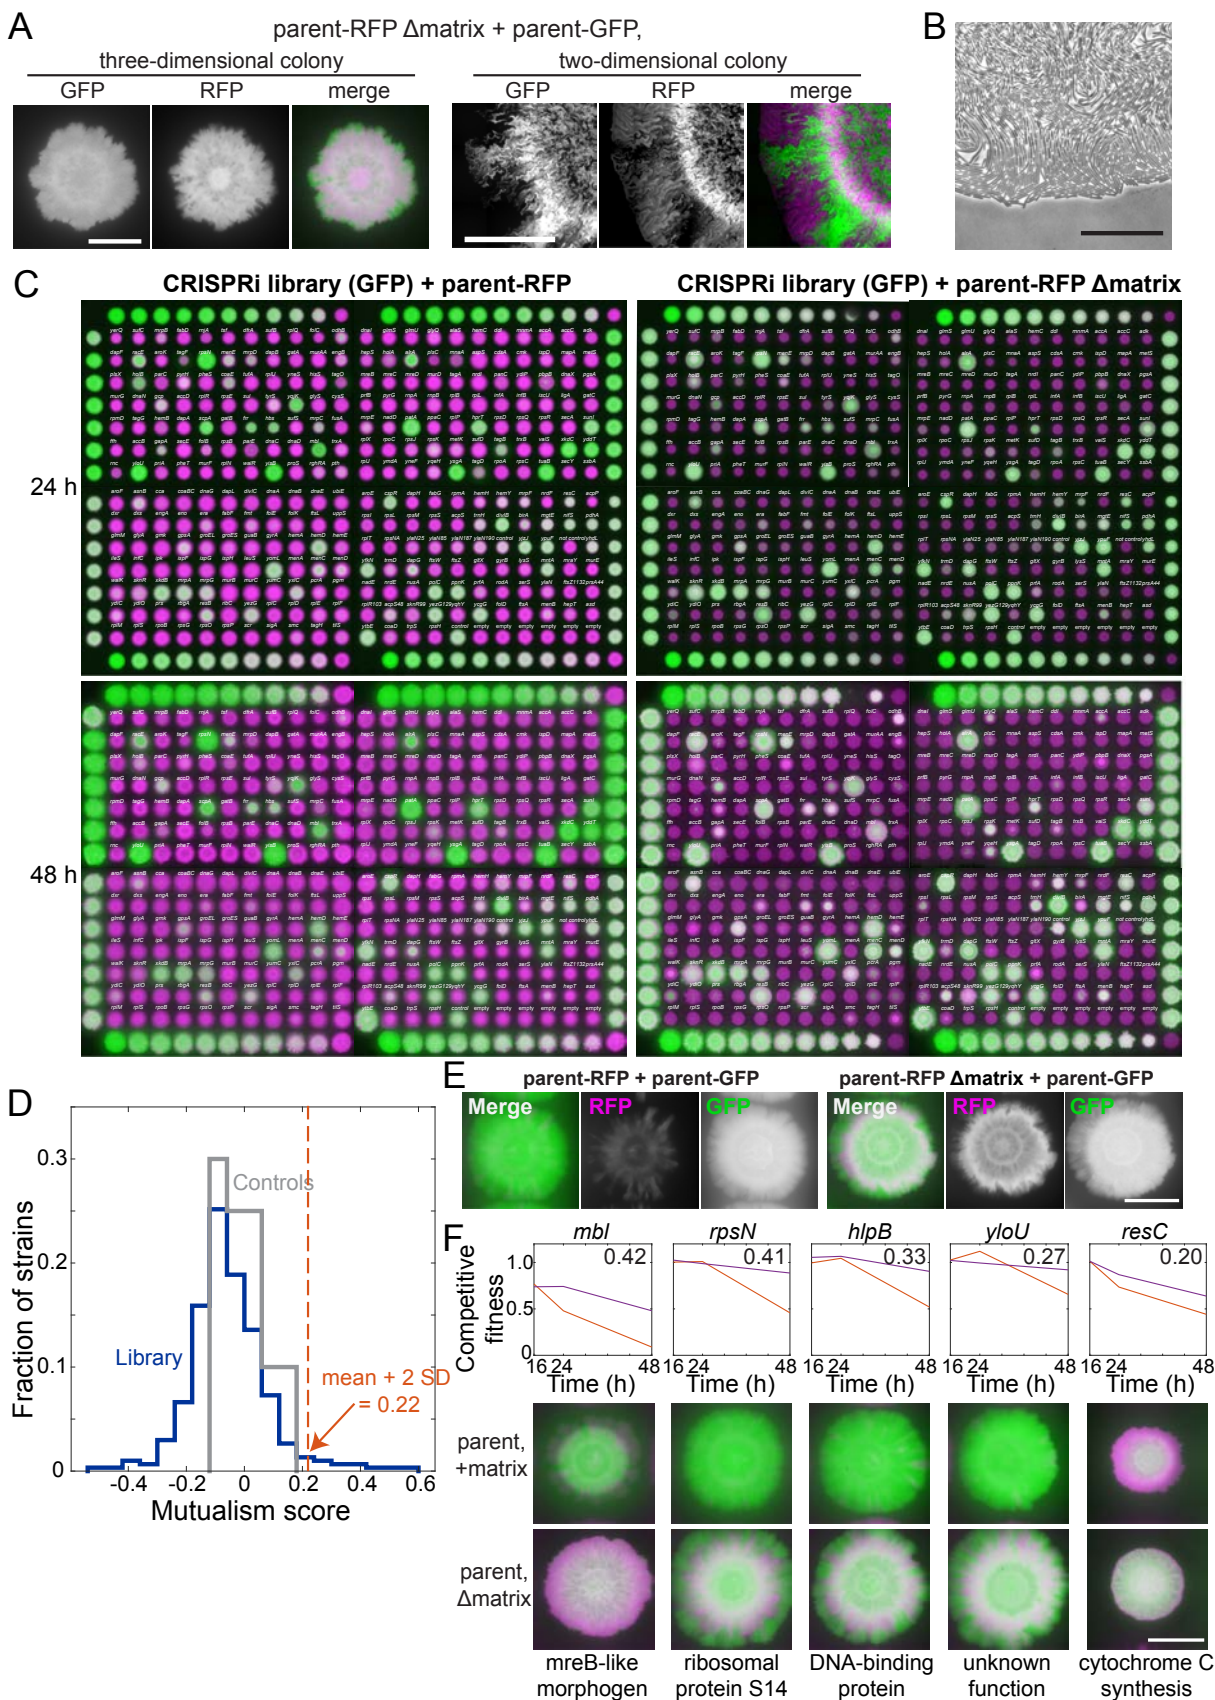

1091 **Figure S6: A mutualism screen reveals full knockdowns with improved growth in**  
1092 **co-culture when the parent is deficient in production of extracellular matrix.**

1093 A) The matrix-deficient parent-RFP+matrix-proficient parent-GFP co-culture did not  
1094 form sectors in a three-dimensional colony (left), but did at the edge of a two-  
1095 dimensional colony (right). Merges show the parent-GFP and parent-RFP strains  
1096 false-colored in green and magenta, respectively. Left scale bar: 5 mm; right  
1097 scale bar: 0.4 mm.

1098 B) The leading edge of a co-culture grown between agar and a coverslip is one cell  
1099 thick. One microliter of cell culture was spotted onto an MSgg-agar pad and a  
1100 coverslip was applied to limit growth to two dimensions. The culture was  
1101 incubated for 24 h and the colony edge was imaged. Scale bar: 50  $\mu$ m.

1102 C) Results from a mutualism screen comparing the competitive fitness of  
1103 knockdown strains co-cultured with a matrix-proficient (left) or matrix-deficient  
1104 (right) parent. Control parent-RFP+parent-GFP co-cultures are located on the  
1105 right and left edges of the library, and the titration row is shown on the top and  
1106 bottom rows. The distance between the centers of neighboring colonies is 9 mm.  
1107 GFP (from parent-GFP or knockdown strains) and RFP (from parent-RFP)  
1108 fluorescence signals are false-colored in green and magenta, respectively.

1109 D) The library exhibited a wide range of mutualism scores, with 11 full knockdowns  
1110 exhibiting a mutualism score  $>2$  standard deviations higher than the across all  
1111 strains ( $>0.22$ ). The library is shown in blue and the controls are shown in gray.

1112 E) Representative controls of the parent-RFP strain grown with the parent-GFP  
1113 strain showing the final composition of RFP and GFP in the colonies. In merged

1114 images, the parent-RFP and parent-GFP are false-colored in magenta and  
1115 green, respectively. These controls are from the mutualism screen at 48 h (and  
1116 are the controls shown in Fig. 5E).

1117 F) Five non-essential gene knockdowns exhibited mutualism. Top: competitive  
1118 fitness of co-cultures with the wild-type-like parent-RFP (magenta) and the matrix  
1119 production-deficient parent (red) at 16, 24, and 48 h. Numbers in top right  
1120 indicate the mutualism score. Bottom: merged images of biofilm-colony co-  
1121 cultures on MSgg-xylose agar at 48 h. Scale bar: 5 mm.



1122 **References**

- 1123 1. Wu, H., Moser, C., Wang, H.Z., Hoiby, N., and Song, Z.J. (2015). Strategies for  
1124 combating bacterial biofilm infections. *Int J Oral Sci* 7, 1-7.
- 1125 2. Lappin-Scott, H.M., and Costerton, J.W. (1989). Bacterial biofilms and surface  
1126 fouling. *Biofouling* 1, 323-342.
- 1127 3. Morikawa, M. (2006). Beneficial biofilm formation by industrial bacteria *Bacillus*  
1128 *subtilis* and related species. *J Biosci Bioeng* 101, 1-8.
- 1129 4. Yannarell, S.M., Grandchamp, G.M., Chen, S.Y., Daniels, K.E., and Shank, E.A.  
1130 (2019). A Dual-Species Biofilm with Emergent Mechanical and Protective  
1131 Properties. *J Bacteriol* 201.
- 1132 5. Fusco, D., Gralka, M., Kayser, J., Anderson, A., and Hallatschek, O. (2016).  
1133 Excess of mutational jackpot events in expanding populations revealed by spatial  
1134 Luria-Delbruck experiments. *Nat Commun* 7, 12760.
- 1135 6. Kayser, J., Schreck, C.F., Yu, Q., Gralka, M., and Hallatschek, O. (2018).  
1136 Emergence of evolutionary driving forces in pattern-forming microbial  
1137 populations. *Philos Trans R Soc Lond B Biol Sci* 373.
- 1138 7. Kim, W., Levy, S.B., and Foster, K.R. (2016). Rapid radiation in bacteria leads to  
1139 a division of labour. *Nat Commun* 7, 10508.
- 1140 8. Beauregard, P.B., Chai, Y., Vlamakis, H., Losick, R., and Kolter, R. (2013).  
1141 *Bacillus subtilis* biofilm induction by plant polysaccharides. *Proc Natl Acad Sci U*  
1142 *S A* 110, E1621-1630.

- 1143 9. Shemesh, M., and Chai, Y. (2013). A combination of glycerol and manganese  
1144 promotes biofilm formation in *Bacillus subtilis* via histidine kinase KinD signaling.  
1145 *J Bacteriol* *195*, 2747-2754.
- 1146 10. Branda, S.S., Gonzalez-Pastor, J.E., Ben-Yehuda, S., Losick, R., and Kolter, R.  
1147 (2001). Fruiting body formation by *Bacillus subtilis*. *Proc Natl Acad Sci U S A* *98*,  
1148 11621-11626.
- 1149 11. Seminara, A., Angelini, T.E., Wilking, J.N., Vlamakis, H., Ebrahim, S., Kolter, R.,  
1150 Weitz, D.A., and Brenner, M.P. (2012). Osmotic spreading of *Bacillus subtilis*  
1151 biofilms driven by an extracellular matrix. *Proc Natl Acad Sci U S A* *109*, 1116-  
1152 1121.
- 1153 12. van Gestel, J., Vlamakis, H., and Kolter, R. (2015). From cell differentiation to cell  
1154 collectives: *Bacillus subtilis* uses division of labor to migrate. *PLoS Biol* *13*,  
1155 e1002141.
- 1156 13. Asally, M., Kittisopikul, M., Rue, P., Du, Y., Hu, Z., Cagatay, T., Robinson, A.B.,  
1157 Lu, H., Garcia-Ojalvo, J., and Suel, G.M. (2012). Localized cell death focuses  
1158 mechanical forces during 3D patterning in a biofilm. *Proc Natl Acad Sci U S A*  
1159 *109*, 18891-18896.
- 1160 14. Lopez, D., Vlamakis, H., and Kolter, R. (2010). Biofilms. *Cold Spring Harb*  
1161 *Perspect Biol* *2*, a000398.
- 1162 15. Vlamakis, H., Chai, Y., Beauregard, P., Losick, R., and Kolter, R. (2013). Sticking  
1163 together: building a biofilm the *Bacillus subtilis* way. *Nat Rev Microbiol* *11*, 157-  
1164 168.

- 1165 16. Blair, K.M., Turner, L., Winkelman, J.T., Berg, H.C., and Kearns, D.B. (2008). A  
1166 molecular clutch disables flagella in the *Bacillus subtilis* biofilm. *Science* 320,  
1167 1636-1638.
- 1168 17. Cairns, L.S., Hogley, L., and Stanley-Wall, N.R. (2014). Biofilm formation by  
1169 *Bacillus subtilis*: new insights into regulatory strategies and assembly  
1170 mechanisms. *Mol Microbiol* 93, 587-598.
- 1171 18. Vlamakis, H., Aguilar, C., Losick, R., and Kolter, R. (2008). Control of cell fate by  
1172 the formation of an architecturally complex bacterial community. *Genes Dev* 22,  
1173 945-953.
- 1174 19. Venturelli, O.S., Carr, A.C., Fisher, G., Hsu, R.H., Lau, R., Bowen, B.P.,  
1175 Hromada, S., Northen, T., and Arkin, A.P. (2018). Deciphering microbial  
1176 interactions in synthetic human gut microbiome communities. *Mol Syst Biol* 14,  
1177 e8157.
- 1178 20. Aranda-Diaz, A., Obadia, B., Dodge, R., Thomsen, T., Hallberg, Z.F., Guvener,  
1179 Z.T., Ludington, W.B., and Huang, K.C. (2020). Bacterial interspecies  
1180 interactions modulate pH-mediated antibiotic tolerance. *Elife* 9.
- 1181 21. Arjes, H.A., Vo, L., Dunn, C.M., Willis, L., DeRosa, C.A., Fraser, C.L., Kearns,  
1182 D.B., and Huang, K.C. (2020). Biosurfactant-Mediated Membrane Depolarization  
1183 Maintains Viability during Oxygen Depletion in *Bacillus subtilis*. *Curr Biol* 30,  
1184 1011-1022 e1016.
- 1185 22. Kehe, J., Kulesa, A., Ortiz, A., Ackerman, C.M., Thakku, S.G., Sellers, D., Kuehn,  
1186 S., Gore, J., Friedman, J., and Blainey, P.C. (2019). Massively parallel screening  
1187 of synthetic microbial communities. *Proc Natl Acad Sci U S A* 116, 12804-12809.

- 1188 23. Ohan, J., Pelle, B., Nath, P., Huang, J.H., Hovde, B., Vuyisich, M., Dichosa, A.E.,  
1189 and Starckenburg, S.R. (2019). High-throughput phenotyping of cell-to-cell  
1190 interactions in gel microdroplet pico-cultures. *Biotechniques* 66, 218-224.
- 1191 24. Stubbendieck, R.M., Vargas-Bautista, C., and Straight, P.D. (2016). Bacterial  
1192 Communities: Interactions to Scale. *Front Microbiol* 7, 1234.
- 1193 25. Temkin, M.I., Carlson, C.M., Stubbendieck, A.L., Currie, C.R., and Stubbendieck,  
1194 R.M. (2019). High Throughput Co-culture Assays for the Investigation of  
1195 Microbial Interactions. *J Vis Exp*.
- 1196 26. Zhang, C., and Straight, P.D. (2019). Antibiotic discovery through microbial  
1197 interactions. *Curr Opin Microbiol* 51, 64-71.
- 1198 27. Shank, E.A., Klepac-Ceraj, V., Collado-Torres, L., Powers, G.E., Losick, R., and  
1199 Kolter, R. (2011). Interspecies interactions that result in *Bacillus subtilis* forming  
1200 biofilms are mediated mainly by members of its own genus. *Proc Natl Acad Sci U*  
1201 *S A* 108, E1236-1243.
- 1202 28. Baba, T., Ara, T., Hasegawa, M., Takai, Y., Okumura, Y., Baba, M., Datsenko,  
1203 K.A., Tomita, M., Wanner, B.L., and Mori, H. (2006). Construction of *Escherichia*  
1204 *coli* K-12 in-frame, single-gene knockout mutants: the Keio collection. *Mol Syst*  
1205 *Biol* 2, 2006 0008.
- 1206 29. Koo, B.M., Kritikos, G., Farelli, J.D., Todor, H., Tong, K., Kimsey, H., Wapinski, I.,  
1207 Galardini, M., Cabal, A., Peters, J.M., et al. (2017). Construction and Analysis of  
1208 Two Genome-Scale Deletion Libraries for *Bacillus subtilis*. *Cell Syst* 4, 291-305  
1209 e297.

- 1210 30. Peters, J.M., Colavin, A., Shi, H., Czarny, T.L., Larson, M.H., Wong, S., Hawkins,  
1211 J.S., Lu, C.H.S., Koo, B.M., Marta, E., et al. (2016). A Comprehensive, CRISPR-  
1212 based Functional Analysis of Essential Genes in Bacteria. *Cell* *165*, 1493-1506.
- 1213 31. Rousset, F., Cui, L., Siouve, E., Becavin, C., Depardieu, F., and Bikard, D.  
1214 (2018). Genome-wide CRISPR-dCas9 screens in *E. coli* identify essential genes  
1215 and phage host factors. *PLoS Genet* *14*, e1007749.
- 1216 32. Brochado, A.R., and Typas, A. (2013). High-throughput approaches to  
1217 understanding gene function and mapping network architecture in bacteria. *Curr*  
1218 *Opin Microbiol* *16*, 199-206.
- 1219 33. Nichols, R.J., Sen, S., Choo, Y.J., Beltrao, P., Zietek, M., Chaba, R., Lee, S.,  
1220 Kazmierczak, K.M., Lee, K.J., Wong, A., et al. (2011). Phenotypic landscape of a  
1221 bacterial cell. *Cell* *144*, 143-156.
- 1222 34. Branda, S.S., Gonzalez-Pastor, J.E., Dervyn, E., Ehrlich, S.D., Losick, R., and  
1223 Kolter, R. (2004). Genes involved in formation of structured multicellular  
1224 communities by *Bacillus subtilis*. *J Bacteriol* *186*, 3970-3979.
- 1225 35. Meeske, A.J., Rodrigues, C.D., Brady, J., Lim, H.C., Bernhardt, T.G., and  
1226 Rudner, D.Z. (2016). High-Throughput Genetic Screens Identify a Large and  
1227 Diverse Collection of New Sporulation Genes in *Bacillus subtilis*. *PLoS Biol* *14*,  
1228 e1002341.
- 1229 36. Qi, L.S., Larson, M.H., Gilbert, L.A., Doudna, J.A., Weissman, J.S., Arkin, A.P.,  
1230 and Lim, W.A. (2013). Repurposing CRISPR as an RNA-guided platform for  
1231 sequence-specific control of gene expression. *Cell* *152*, 1173-1183.

- 1232 37. Larson, M.H., Gilbert, L.A., Wang, X., Lim, W.A., Weissman, J.S., and Qi, L.S.  
1233 (2013). CRISPR interference (CRISPRi) for sequence-specific control of gene  
1234 expression. *Nat Protoc* 8, 2180-2196.
- 1235 38. Noirot-Gros, M.F., Forrester, S., Malato, G., Larsen, P.E., and Noirot, P. (2019).  
1236 CRISPR interference to interrogate genes that control biofilm formation in  
1237 *Pseudomonas fluorescens*. *Sci Rep* 9, 15954.
- 1238 39. Kobayashi, K., Ehrlich, S.D., Albertini, A., Amati, G., Andersen, K.K., Arnaud, M.,  
1239 Asai, K., Ashikaga, S., Aymerich, S., Bessieres, P., et al. (2003). Essential  
1240 *Bacillus subtilis* genes. *Proc Natl Acad Sci U S A* 100, 4678-4683.
- 1241 40. Cava, F., de Pedro, M.A., Lam, H., Davis, B.M., and Waldor, M.K. (2011).  
1242 Distinct pathways for modification of the bacterial cell wall by non-canonical D-  
1243 amino acids. *EMBO J* 30, 3442-3453.
- 1244 41. Flemming, H.C., and Wingender, J. (2010). The biofilm matrix. *Nat Rev Microbiol*  
1245 8, 623-633.
- 1246 42. Srinivasan, S., Vladescu, I.D., Koehler, S.A., Wang, X., Mani, M., and Rubinstein,  
1247 S.M. (2018). Matrix Production and Sporulation in *Bacillus subtilis* Biofilms  
1248 Localize to Propagating Wave Fronts. *Biophys J* 114, 1490-1498.
- 1249 43. Srinivasan, S., Kaplan, C.N., and Mahadevan, L. (2019). A multiphase theory for  
1250 spreading microbial swarms and films. *Elife* 8.
- 1251 44. Lam, H., Oh, D.C., Cava, F., Takacs, C.N., Clardy, J., de Pedro, M.A., and  
1252 Waldor, M.K. (2009). D-amino acids govern stationary phase cell wall remodeling  
1253 in bacteria. *Science* 325, 1552-1555.

- 1254 45. Yan, J., Nadell, C.D., Stone, H.A., Wingreen, N.S., and Bassler, B.L. (2017).  
1255 Extracellular-matrix-mediated osmotic pressure drives *Vibrio cholerae* biofilm  
1256 expansion and cheater exclusion. *Nat Commun* 8, 327.
- 1257 46. Dragos, A., Martin, M., Falcon Garcia, C., Kricks, L., Pausch, P., Heimerl, T.,  
1258 Balint, B., Maroti, G., Bange, G., Lopez, D., et al. (2018). Collapse of genetic  
1259 division of labour and evolution of autonomy in pellicle biofilms. *Nat Microbiol* 3,  
1260 1451-1460.
- 1261 47. Yasbin, R.E., and Young, F.E. (1974). Transduction in *Bacillus subtilis* by  
1262 bacteriophage SPP1. *J Virol* 14, 1343-1348.
- 1263 48. Moran, U., Phillips, R., and Milo, R. (2010). SnapShot: key numbers in biology.  
1264 *Cell* 141, 1262-1262 e1261.
- 1265 49. Edelstein, A.D., Tsuchida, M.A., Amodaj, N., Pinkard, H., Vale, R.D., and  
1266 Stuurman, N. (2014). Advanced methods of microscope control using  
1267 muManager software. *J Biol Methods* 1.

1268
